# Supplementary material for: Key Residues and Phosphate Release Routes in the Saccharomyces cerevisiae Pho84 Transceptor: THE ROLE OF TYR179 IN FUNCTIONAL REGULATION
Source: PubMed Central journal article supplement (PMC5159500; doi:10.1074/jbc.m116.738112), 2016-11-08
Supplement: 10.1074_M116.738112_jbc.M116.738112-1.pdf [file 10.1074_M116.738112_jbc.M116.738112-1.pdf]

Supporting Information for:

# Key Residues and Phosphate Release Routes in the *Saccharomyces cerevisiae* Pho84 Transceptor – The Role of Tyr<sup>179</sup> in Functional Regulation

Dieter R. Samyn,<sup>2,†</sup> Jeroen van der Veken,<sup>2,§</sup> Griet Van Zeebroeck,<sup>3,4</sup> Bengt L. Persson,<sup>2</sup> Björn C. G. Karlsson<sup>1,2,\*</sup>

<sup>1</sup> Computational Chemistry & Biochemistry Group. <sup>2</sup> Linnæus University Centre for Biomaterials Chemistry, Linnæus University, SE-391 82 Kalmar, Sweden. <sup>3</sup> Department of Molecular Microbiology, VIB, Kasteelpark Arenberg 31, BE-3001 Leuven-Heverlee, Flanders, Belgium. <sup>4</sup> Laboratory of Molecular Cell Biology, Institute of Botany and Microbiology, Katholieke Universiteit Leuven, Kasteelpark Arenberg 31, BE-3001 Leuven-Heverlee, Flanders, Belgium.

Present addresses:

† Concordia University, Loyola Campus, Biology Department, 7141 Sherbrooke St W, Montréal, H4B 1R6, QC Canada.

§ Plant Sciences Unit, Applied Genetics and Breeding, Institute for Agricultural and Fisheries Research (ILVO), Caritasstraat 39, BE-9090 Melle, Belgium.

\* Correspondence to:

Björn C.G. Karlsson

E-mail: [bjorn.karlsson@lnu.se](mailto:bjorn.karlsson@lnu.se)

Tel: +46-480-446740

Fax: +46-480-446262

| <b>Table of Contents</b>                                      | <b>Name</b>       | <b>Page(s)</b> |
|---------------------------------------------------------------|-------------------|----------------|
| <b>Molecular Dynamics (MD) System Design</b>                  |                   |                |
| <u>Box Dimensions and Total Number of Molecules/Residues:</u> | <i>Table S1</i>   | <i>S3</i>      |
| <b>Unrestrained MD Simulation Data</b>                        |                   |                |
| <u>Potential, Kinetic &amp; Total Energy:</u>                 |                   |                |
| <i>Pho84</i>                                                  | <i>Figure S1</i>  | <i>S4</i>      |
| <i>Pho84 – Asp178-H</i>                                       | <i>Figure S2</i>  | <i>S5</i>      |
| <i>Pho84 – neu</i>                                            | <i>Figure S3</i>  | <i>S6</i>      |
| <i>Pho84 – neu – Asp178-H</i>                                 | <i>Figure S4</i>  | <i>S7</i>      |
| <i>Pho84 – minus</i>                                          | <i>Figure S5</i>  | <i>S8</i>      |
| <i>Pho84 – minus – Asp178-H</i>                               | <i>Figure S6</i>  | <i>S9</i>      |
| <i>Pho84 – 2minus</i>                                         | <i>Figure S7</i>  | <i>S10</i>     |
| <i>Pho84 – 2minus – Asp178-H</i>                              | <i>Figure S8</i>  | <i>S11</i>     |
| <u>Temperature &amp; Density:</u>                             |                   |                |
| <i>Pho84</i>                                                  | <i>Figure S9</i>  | <i>S12</i>     |
| <i>Pho84 – Asp178-H</i>                                       | <i>Figure S10</i> | <i>S13</i>     |
| <i>Pho84 – neu</i>                                            | <i>Figure S11</i> | <i>S14</i>     |
| <i>Pho84 – neu – Asp178-H</i>                                 | <i>Figure S12</i> | <i>S15</i>     |
| <i>Pho84 – minus</i>                                          | <i>Figure S13</i> | <i>S16</i>     |
| <i>Pho84 – minus – Asp178-H</i>                               | <i>Figure S14</i> | <i>S17</i>     |
| <i>Pho84 – 2minus</i>                                         | <i>Figure S15</i> | <i>S18</i>     |
| <i>Pho84 – 2minus – Asp178-H</i>                              | <i>Figure S16</i> | <i>S19</i>     |

|                                                                                                                |                   |                |
|----------------------------------------------------------------------------------------------------------------|-------------------|----------------|
| <u>Transmembrane Helix RMSD</u>                                                                                | <i>Figure S17</i> | <i>S20</i>     |
| <u>Atomic Distances</u>                                                                                        |                   |                |
| <i>P<sub>i</sub>-Lys<sup>492</sup> &amp; P<sub>i</sub>-Asp<sup>178</sup>/P<sub>i</sub>-Asp<sup>178</sup>-H</i> | <i>Figure S18</i> | <i>S21</i>     |
| <i>Asp<sup>178</sup>/Asp<sup>178</sup>-H-Asp<sup>76</sup></i>                                                  | <i>Figure S19</i> | <i>S22</i>     |
| <i>P<sub>i</sub>-Tyr<sup>179</sup></i>                                                                         | <i>Figure S20</i> | <i>S23</i>     |
| <b>Steered Molecular Dynamics (SMD) Simulation Data</b>                                                        |                   |                |
| <u>Force Profiles:</u>                                                                                         |                   |                |
| <i>Pho84 – neu / Pho84 – minus – Asp178-H / Pho84 – minus</i>                                                  | <i>Figure S21</i> | <i>S24</i>     |
| <i>Pho84 – 2minus</i>                                                                                          | <i>Figure S22</i> | <i>S25</i>     |
| <u>Work Profiles:</u>                                                                                          |                   |                |
| <i>Pho84 – neu / Pho84 – minus – Asp178-H / Pho84 – minus</i>                                                  | <i>Figure S23</i> | <i>S26</i>     |
| <i>Pho84 – 2minus</i>                                                                                          | <i>Figure S24</i> | <i>S26</i>     |
| <u>Pho84 Residue-P<sub>i</sub> Hydrogen Bonding:</u>                                                           |                   |                |
| <i>Pho84 – neu</i>                                                                                             | <i>Table S2</i>   | <i>S27</i>     |
| <i>Pho84 – minus – Asp178-H</i>                                                                                | <i>Table S3</i>   | <i>S28</i>     |
| <i>Pho84 – minus</i>                                                                                           | <i>Table S4</i>   | <i>S29</i>     |
| <i>Pho84 – 2minus</i>                                                                                          | <i>Table S5</i>   | <i>S30</i>     |
| <u>Pho84 Residue-P<sub>i</sub> Hydrogen Bond Formation and Disruption Lifetime:</u>                            |                   |                |
| <i>Pho84 – neu</i>                                                                                             | <i>Figure S25</i> | <i>S31-S32</i> |
| <i>Pho84 – minus – Asp178-H</i>                                                                                | <i>Figure S26</i> | <i>S33-S34</i> |
| <i>Pho84 – minus</i>                                                                                           | <i>Figure S27</i> | <i>S35-S36</i> |
| <i>Pho84 – 2minus</i>                                                                                          | <i>Figure S28</i> | <i>S36</i>     |
| <u>Water-P<sub>i</sub> Hydrogen Bonding:</u>                                                                   |                   |                |
| <i>Pho84 – neu / Pho84 – minus – Asp178-H / Pho84 – minus</i>                                                  | <i>Figure S29</i> | <i>S37</i>     |
| <i>Pho84 – 2minus</i>                                                                                          | <i>Figure S30</i> | <i>S38</i>     |
| <u>Release Routes:</u>                                                                                         |                   |                |
| <i>Pho84 – neu</i>                                                                                             | <i>Figure S31</i> | <i>S39-S40</i> |
| <i>Pho84 – minus – Asp178-H</i>                                                                                | <i>Figure S32</i> | <i>S41-S42</i> |
| <i>Pho84 – minus</i>                                                                                           | <i>Figure S33</i> | <i>S43-S44</i> |
| <i>Pho84 – 2minus</i>                                                                                          | <i>Figure S34</i> | <i>S44</i>     |

## MD System Design

### Box Dimensions and Total Number of Molecules/Residues:

**Table S1.** Total number of molecules added in each system and final equilibrated box dimensions

| System                                                                              | Box size <sub>t=30ns</sub> (x*y*z /Å <sup>3</sup> ) <sup>a</sup> | Number of molecules/residues |                |                |                 |      |       |
|-------------------------------------------------------------------------------------|------------------------------------------------------------------|------------------------------|----------------|----------------|-----------------|------|-------|
|                                                                                     |                                                                  | Pho84                        | P <sub>i</sub> | K <sup>+</sup> | Cl <sup>-</sup> | POPC | Water |
| Pho84 (without P <sub>i</sub> in the binding site)                                  | 99.65×96.16×113.31                                               | 497                          | -              | 48             | 48              | 247  | 23316 |
| Pho84 & protonated Asp <sup>178</sup>                                               | 97.34×98.33×113.48                                               | 497                          | -              | 48             | 49              | 247  | 23315 |
| Pho84 & H <sub>3</sub> PO <sub>4</sub>                                              | 96.92×98.64×113.62                                               | 497                          | 1              | 48             | 48              | 247  | 23316 |
| Pho84 & H <sub>3</sub> PO <sub>4</sub> & protonated Asp <sup>178</sup>              | 104.24×90.70×114.82                                              | 497                          | 1              | 48             | 49              | 247  | 23315 |
| Pho84 & H <sub>2</sub> PO <sub>4</sub> <sup>-</sup>                                 | 95.48×99.48×114.04                                               | 497                          | 1              | 49             | 48              | 247  | 23315 |
| Pho84 & H <sub>2</sub> PO <sub>4</sub> <sup>-</sup> & protonated Asp <sup>178</sup> | 99.66×95.77×113.72                                               | 497                          | 1              | 49             | 49              | 247  | 23314 |
| Pho84 & HPO <sub>4</sub> <sup>2-</sup>                                              | 98.22×99.11×111.50                                               | 497                          | 1              | 50             | 48              | 247  | 23315 |
| Pho84 & HPO <sub>4</sub> <sup>2-</sup> & protonated Asp <sup>178</sup>              | 106.17×89.68×113.99                                              | 497                          | 1              | 50             | 49              | 247  | 23314 |

<sup>a</sup> Box size<sub>t=0</sub> = 100.11×100.11×118.27Å<sup>3</sup>

## Unrestrained MD Simulation Data

### Potential, Kinetic, & Total Energy:

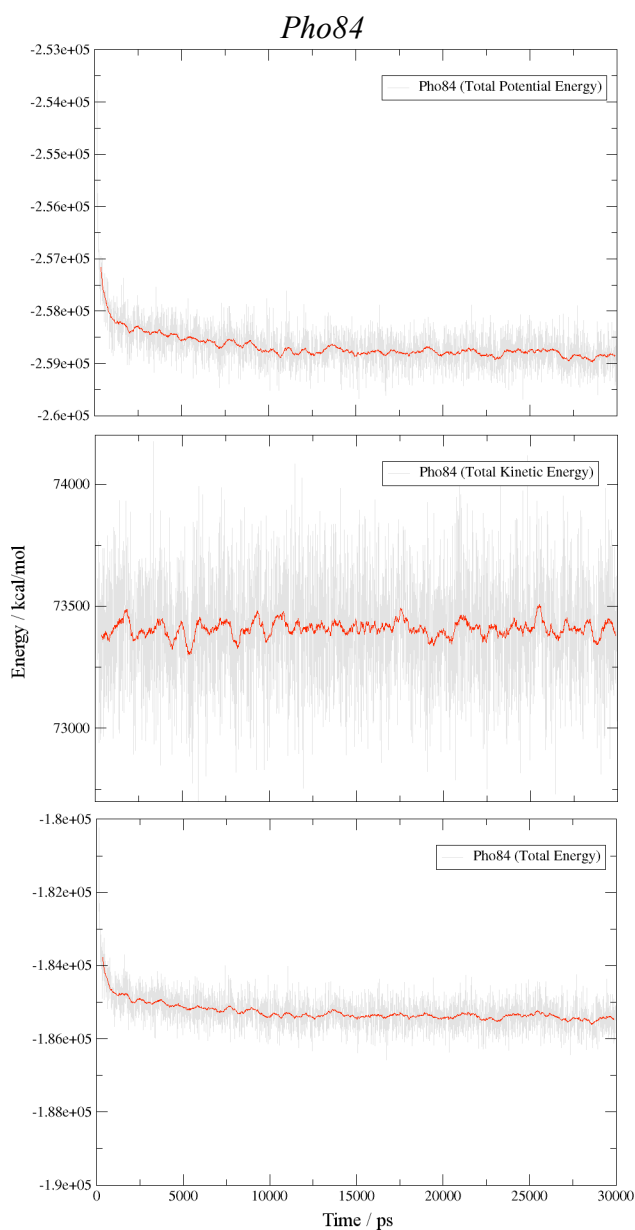

**Figure S1.** MD equilibration data extracted from a 30 ns simulation of fully solvated 1-palmitoyl-2-oleoyl-*sn*-glycero-3-phosphocholine (POPC) bilayer-embedded Pho84 without P<sub>i</sub> in the binding site (Pho84). Potential, kinetic, and total energy (kcal/mol) fluctuations over time (ps; in gray) and a 50 data point running average (in red) are shown.



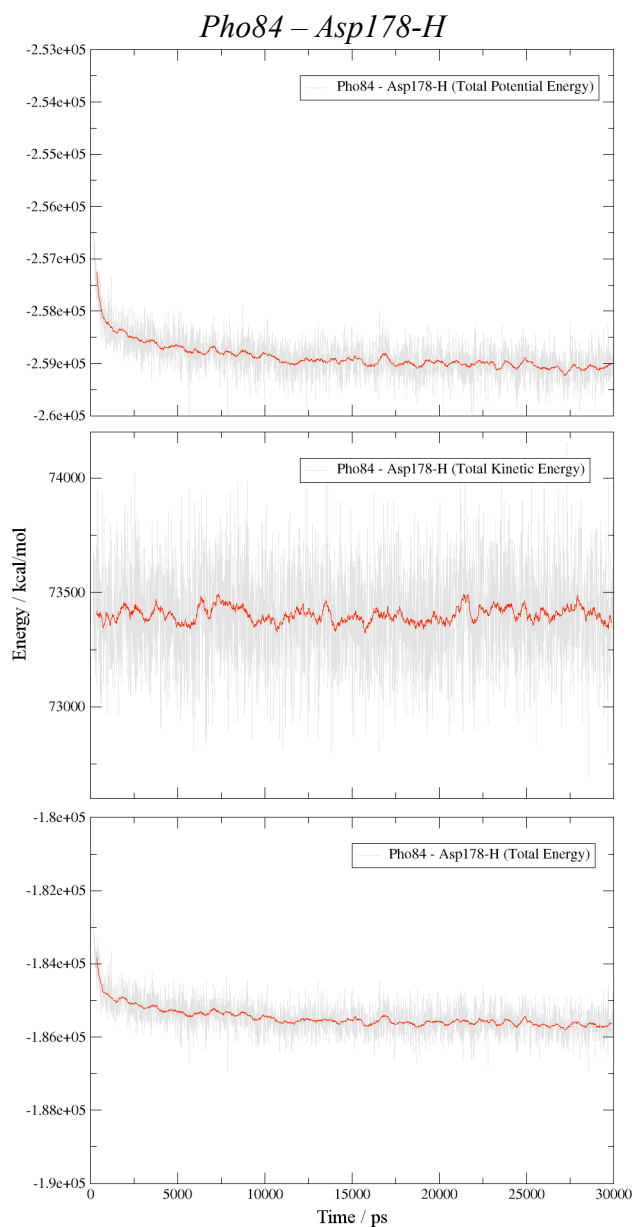

**Figure S2.** MD equilibration data extracted from a 30 ns simulation of fully solvated 1-palmitoyl-2-oleoyl-*sn*-glycero-3-phosphocholine (POPC) bilayer-embedded Pho84 with a protonated Asp178 and without P<sub>i</sub> in the binding site (Pho84 – Asp178-H). Potential, kinetic, and total energy (kcal/mol) fluctuations over time (ps; in gray) and a 50 data point running average (in red) are shown.

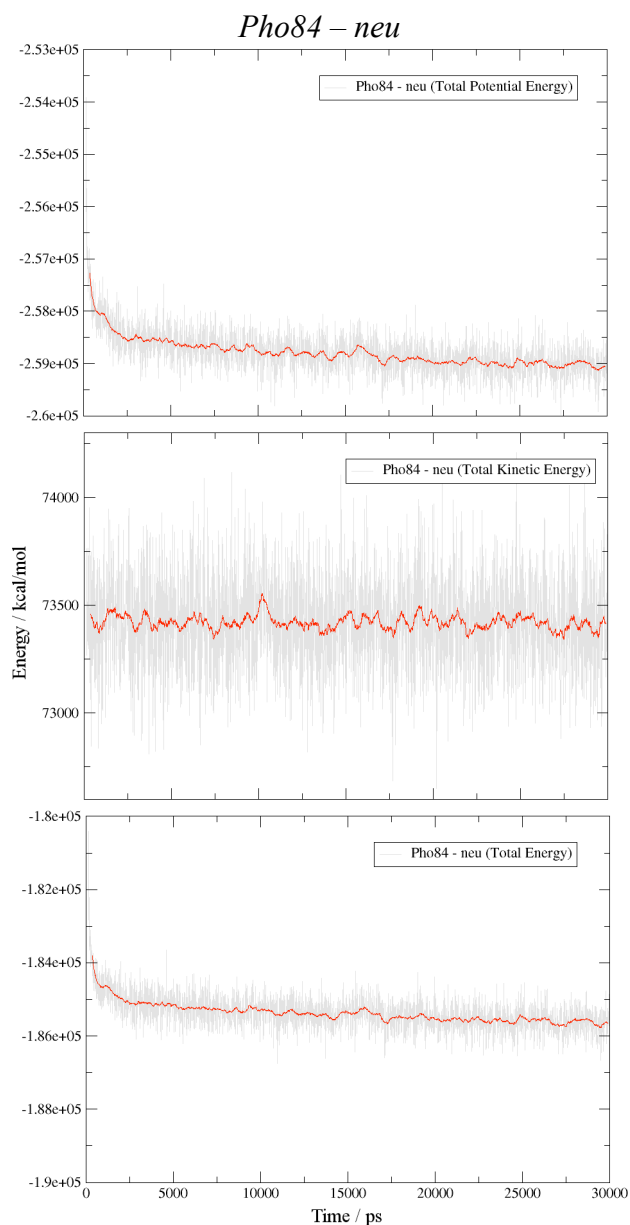

**Figure S3.** MD equilibration data extracted from a 30 ns simulation of fully solvated 1-palmitoyl-2-oleoyl-*sn*-glycero-3-phosphocholine (POPC) bilayer-embedded Pho84 with neutral H<sub>3</sub>PO<sub>4</sub> in the binding site (Pho84 – neu). Potential, kinetic, and total energy (kcal/mol) fluctuations over time (ps; in gray) and a 50 data point running average (in red) are shown.

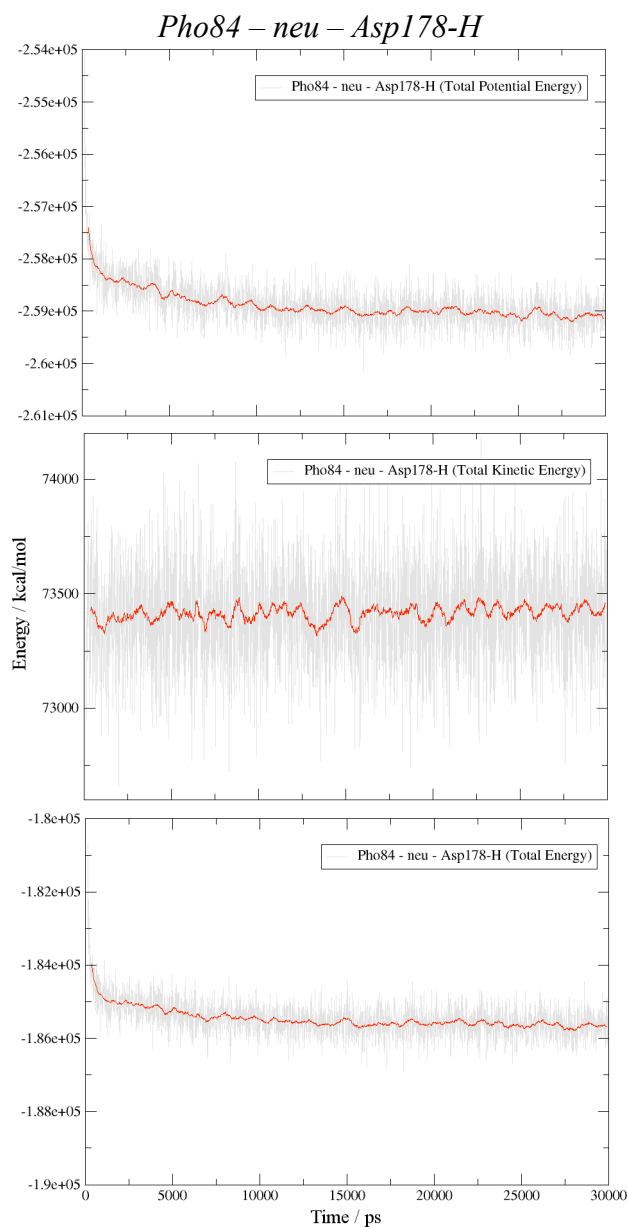

**Figure S4.** MD equilibration data extracted from a 30 ns simulation of fully solvated 1-palmitoyl-2-oleoyl-*sn*-glycero-3-phosphocholine (POPC) bilayer-embedded Pho84 with protonated Asp178 and with neutral H<sub>3</sub>PO<sub>4</sub> in the binding site (Pho84 – neu – Asp178-H). Potential, kinetic, and total energy (kcal/mol) fluctuations over time (ps; in gray) and a 50 data point running average (in red) are shown.

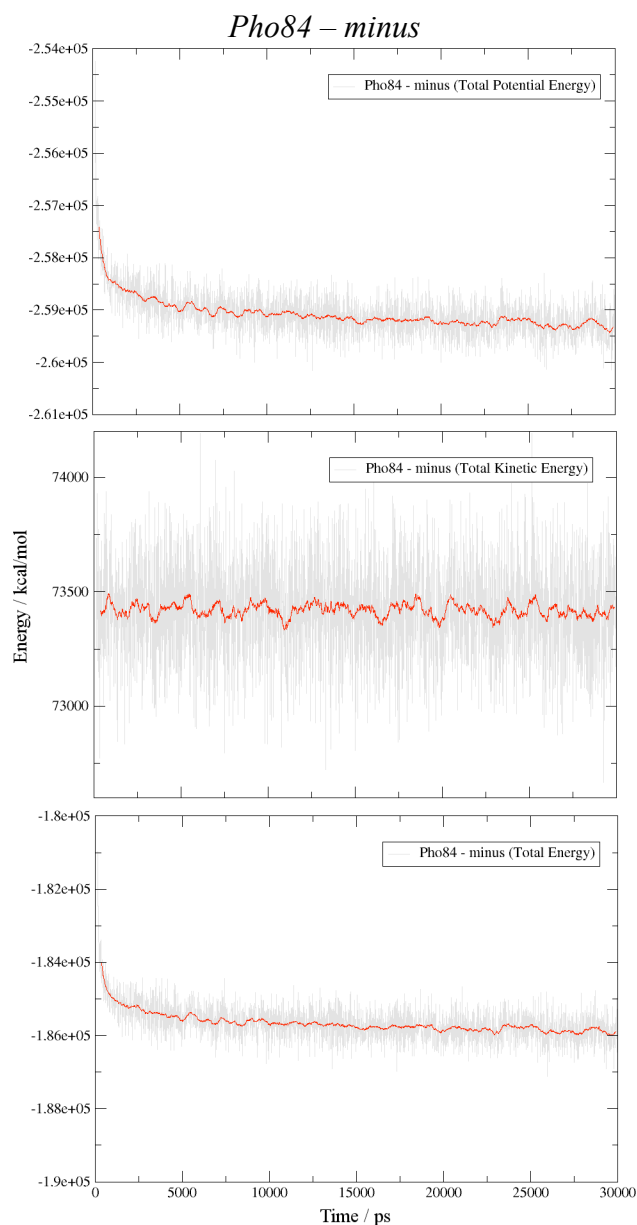

**Figure S5.** MD equilibration data extracted from a 30 ns simulation of fully solvated 1-palmitoyl-2-oleoyl-*sn*-glycero-3-phosphocholine (POPC) bilayer-embedded Pho84 with the single-charged phosphate  $\text{H}_2\text{PO}_4^-$  in the binding site (Pho84 – minus). Potential, kinetic, and total energy (kcal/mol) fluctuations over time (ps; in gray) and a 50 data point running average (in red) are shown.

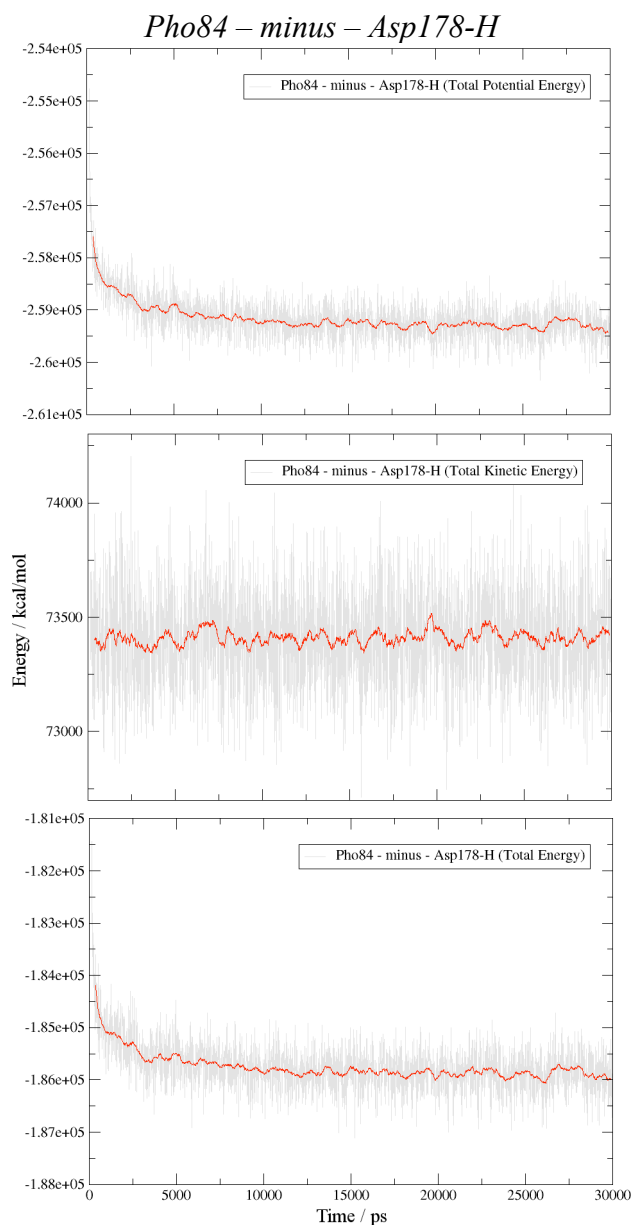

**Figure S6.** MD equilibration data extracted from a 30 ns simulation of fully solvated 1-palmitoyl-2-oleoyl-*sn*-glycero-3-phosphocholine (POPC) bilayer-embedded Pho84 with protonated Asp178 and with the single-charged phosphate  $\text{H}_2\text{PO}_4^-$  in the binding site (Pho84 – minus – Asp178-H). Potential, kinetic, and total energy (kcal/mol) fluctuations over time (ps; in gray) and a 50 data point running average (in red) are shown.

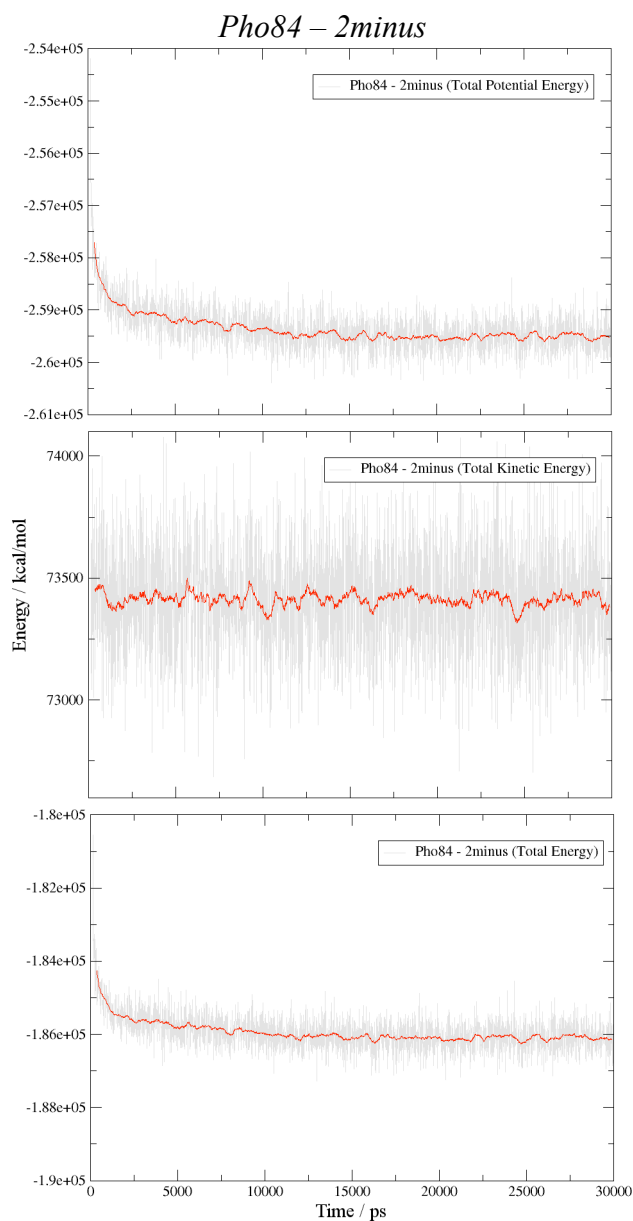

**Figure S7.** MD equilibration data extracted from a 30 ns simulation of fully solvated 1-palmitoyl-2-oleoyl-*sn*-glycero-3-phosphocholine (POPC) bilayer-embedded Pho84 with the double-charged phosphate  $\text{HPO}_4^{2-}$  in the binding site (Pho84 – 2minus). Potential, kinetic, and total energy (kcal/mol) fluctuations over time (ps; in gray) and a 50 data point running average (in red) are shown.

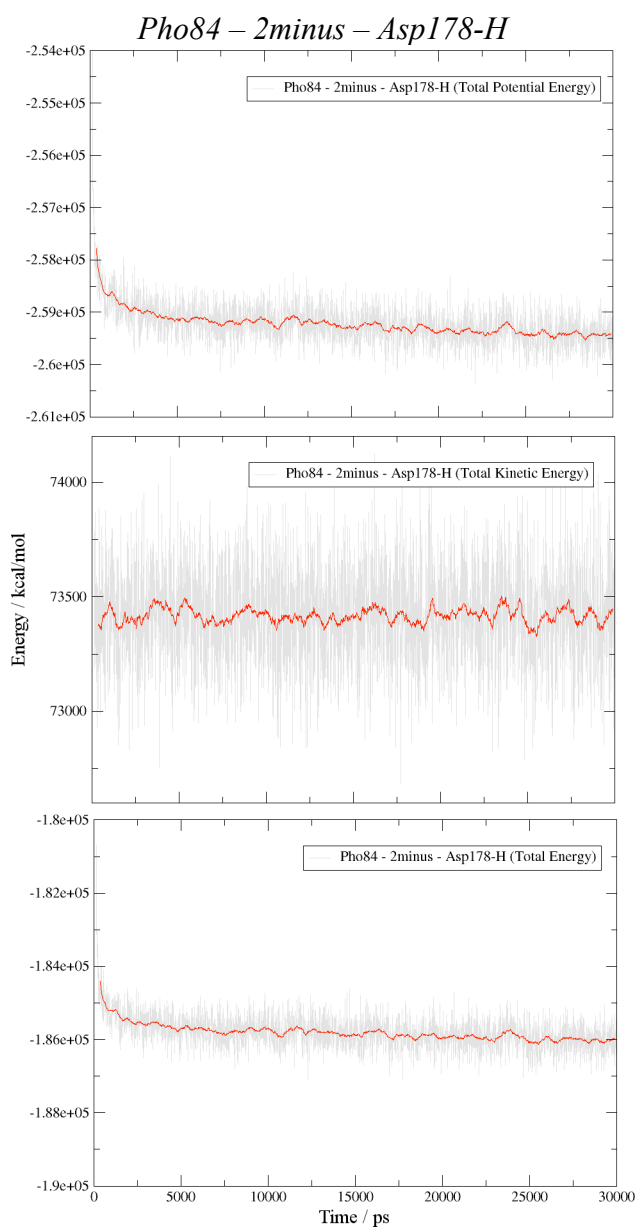

**Figure S8.** MD equilibration data extracted from a 30 ns simulation of fully solvated 1-palmitoyl-2-oleoyl-*sn*-glycero-3-phosphocholine (POPC) bilayer-embedded Pho84 with protonated Asp178 and with the double-charged phosphate  $\text{HPO}_4^{2-}$  in the binding site (Pho84 – 2minus – Asp178-H). Potential, kinetic, and total energy (kcal/mol) fluctuations over time (ps; in gray) and a 50 data point running average (in red) are shown.

## Temperature & Density

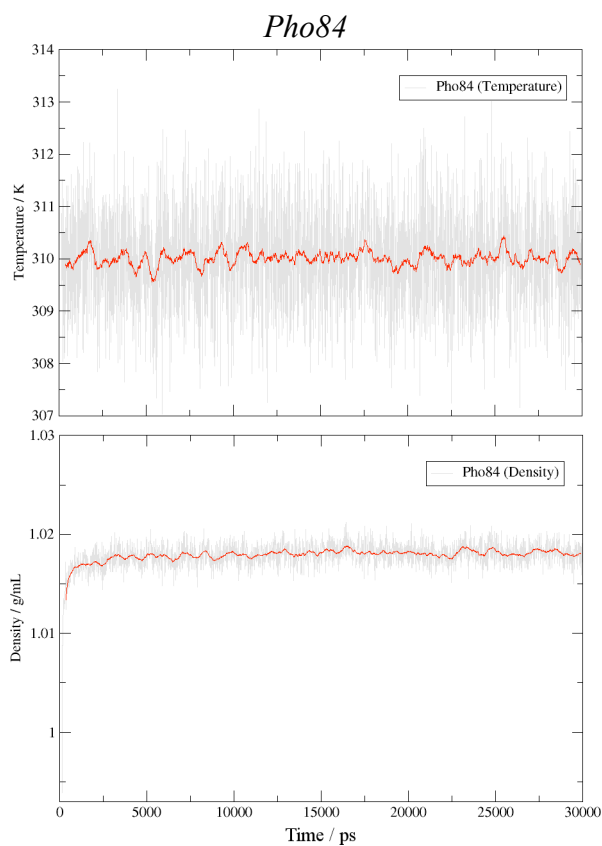

**Figure S9.** MD equilibration data extracted from a 30 ns simulation of fully solvated 1-palmitoyl-2-oleoyl-*sn*-glycero-3-phosphocholine (POPC) bilayer-embedded Pho84 without P<sub>i</sub> in the binding site (Pho84). Fluctuations in temperature (K) and density (g/mL) over time (ps; in gray) and a 50 data point running average (in red) are shown.



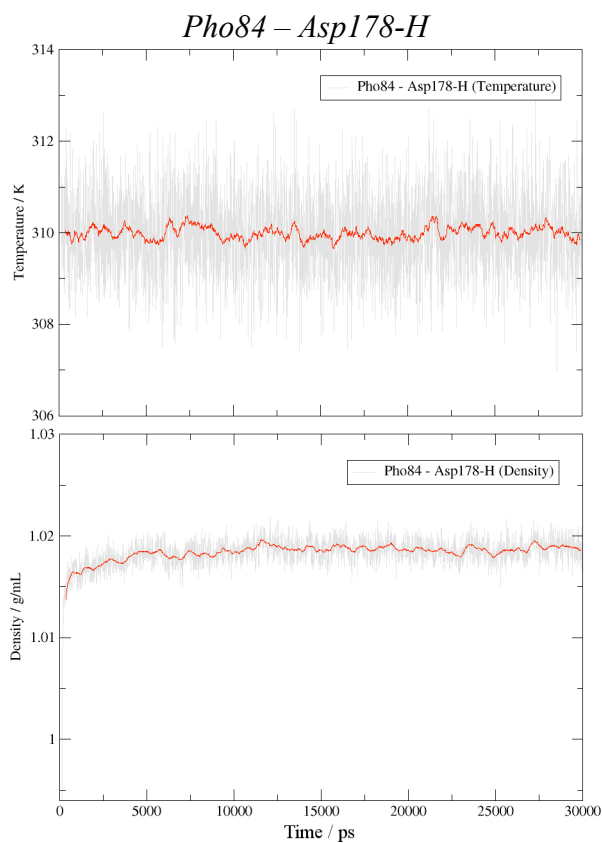

**Figure S10.** MD equilibration data extracted from a 30 ns simulation of fully solvated 1-palmitoyl-2-oleoyl-*sn*-glycero-3-phosphocholine (POPC) bilayer-embedded Pho84 with protonated Asp178, but without P<sub>i</sub> in the binding site (Pho84 – Asp178-H). Fluctuations in temperature (K) and density (g/mL) over time (ps; in gray) and a 50 data point running average (in red) are shown.

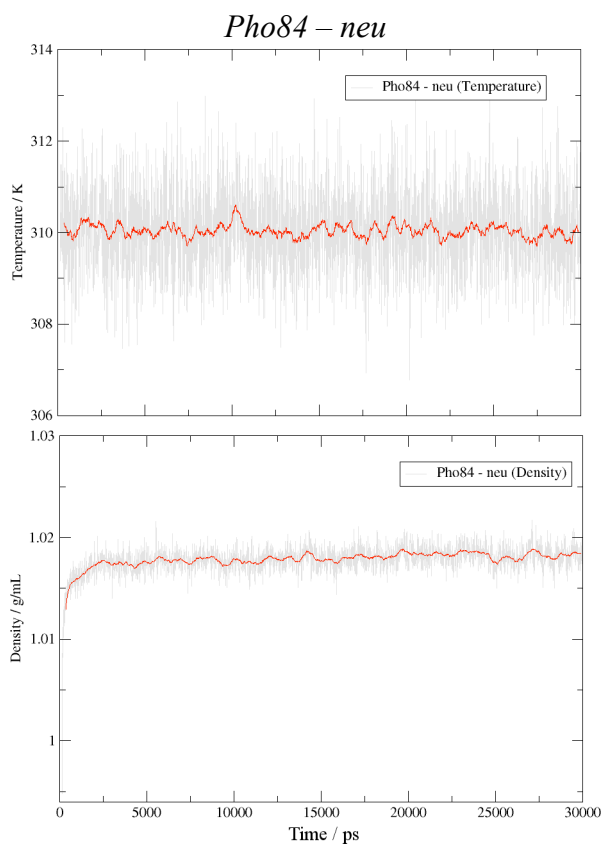

**Figure S11.** MD equilibration data extracted from a 30 ns simulation of fully solvated 1-palmitoyl-2-oleoyl-*sn*-glycero-3-phosphocholine (POPC) bilayer-embedded Pho84 with neutral H<sub>3</sub>PO<sub>4</sub> in the binding site (Pho84 – neu). Fluctuations in temperature (K) and density (g/mL) over time (ps; in gray) and a 50 data point running average (in red) are shown.

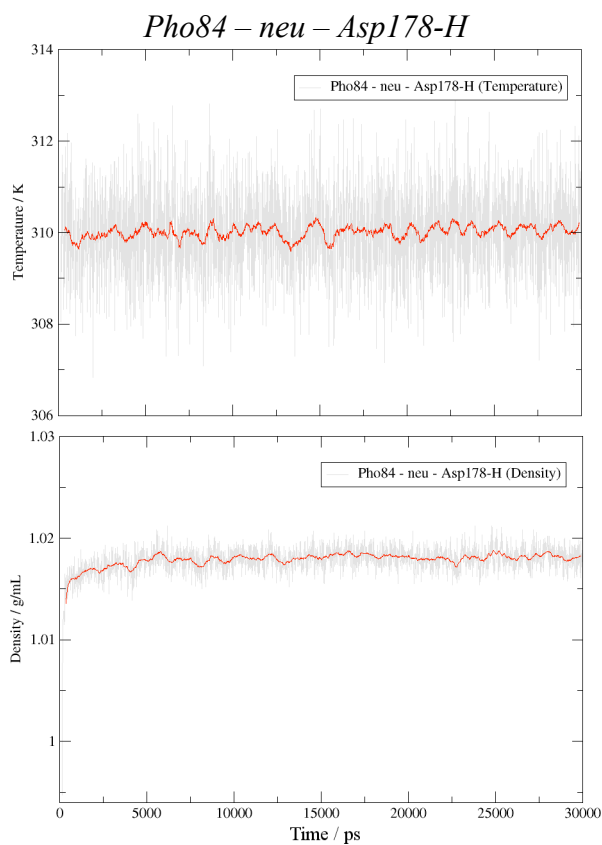

**Figure S12.** MD equilibration data extracted from a 30 ns simulation of fully solvated 1-palmitoyl-2-oleoyl-*sn*-glycero-3-phosphocholine (POPC) bilayer-embedded Pho84 with protonated Asp178 and with neutral H<sub>3</sub>PO<sub>4</sub> in the binding site (Pho84 – neu – Asp178-H). Fluctuations in temperature (K) and density (g/mL) over time (ps; in gray) and a 50 data point running average (in red) are shown.

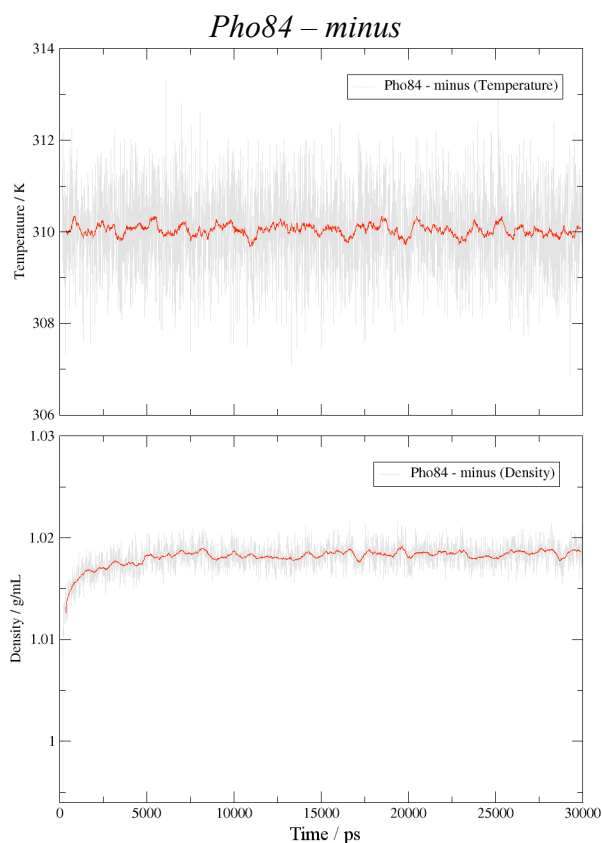

**Figure S13.** MD equilibration data extracted from a 30 ns simulation of fully solvated 1-palmitoyl-2-oleoyl-*sn*-glycero-3-phosphocholine (POPC) bilayer-embedded Pho84 with single-charged phosphate  $\text{H}_2\text{PO}_4^-$  in the binding site (Pho84 – minus). Fluctuations in temperature (K) and density (g/mL) over time (ps; in gray) and a 50 data point running average (in red) are shown.

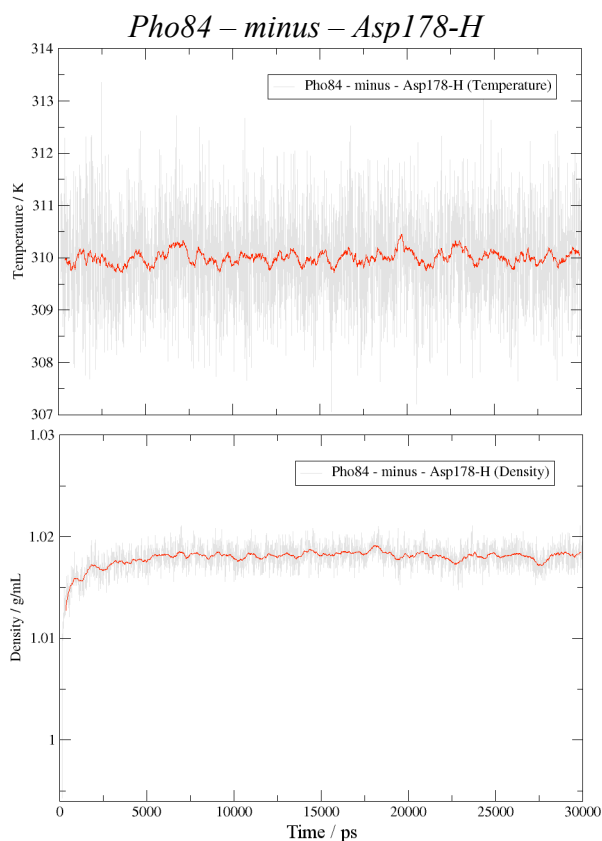

**Figure S14.** MD equilibration data extracted from a 30 ns simulation of fully solvated 1-palmitoyl-2-oleoyl-*sn*-glycero-3-phosphocholine (POPC) bilayer-embedded Pho84 with protonated Asp178 and with single-charged phosphate  $\text{H}_2\text{PO}_4^-$  in the binding site (Pho84 – minus – Asp178-H). Fluctuations in temperature (K) and density (g/mL) over time (ps; in gray) and a 50 data point running average (in red) are shown.

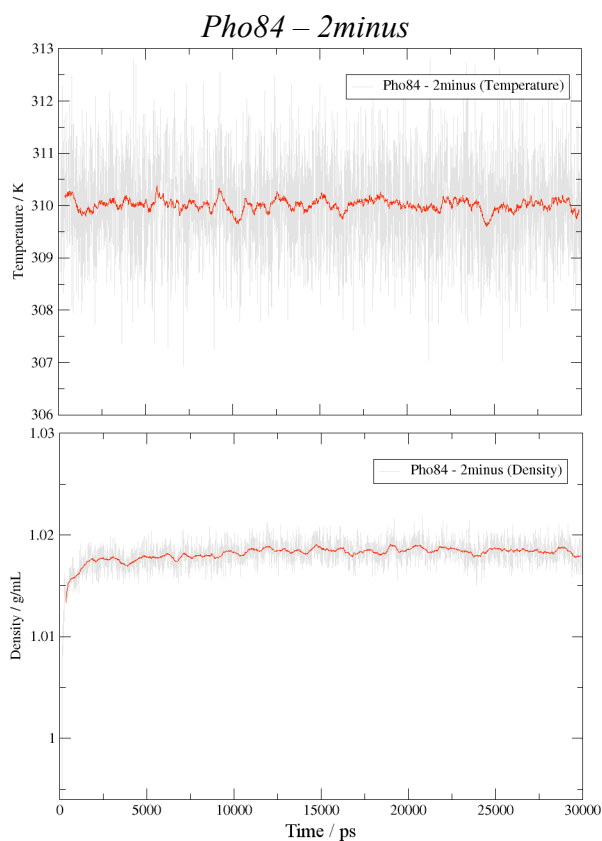

**Figure S15.** MD equilibration data extracted from a 30 ns simulation of fully solvated 1-palmitoyl-2-oleoyl-*sn*-glycero-3-phosphocholine (POPC) bilayer-embedded Pho84 with double-charged phosphate  $\text{HPO}_4^{2-}$  in the binding site (Pho84 – 2minus). Fluctuations in temperature (K) and density (g/mL) over time (ps; in gray) and a 50 data point running average (in red) are shown.

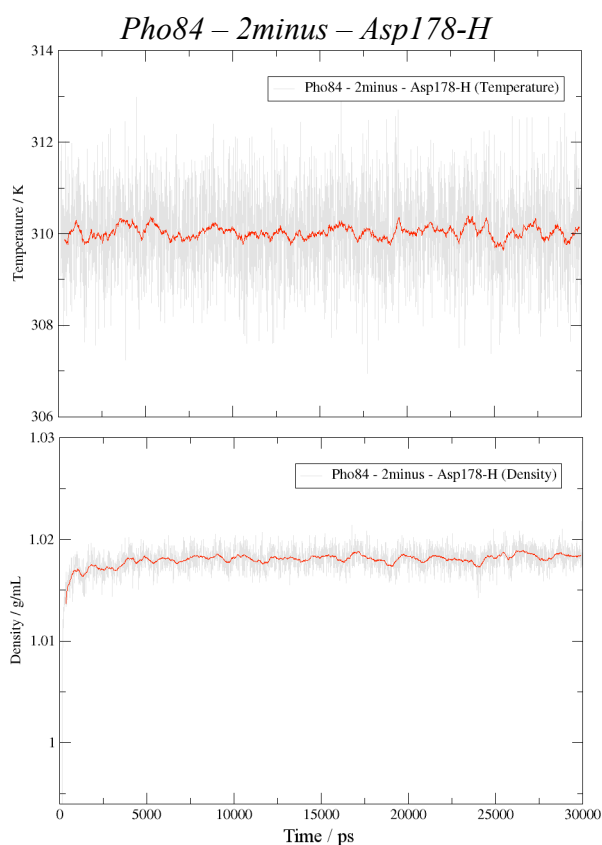

**Figure S16.** MD equilibration data extracted from a 30 ns simulation of fully solvated 1-palmitoyl-2-oleoyl-*sn*-glycero-3-phosphocholine (POPC) bilayer-embedded Pho84 with protonated Asp178 and with double-charged phosphate  $\text{HPO}_4^{2-}$  in the binding site (Pho84 – 2minus – Asp178-H). Fluctuations in temperature (K) and density (g/mL) over time (ps; in gray) and a 50 data point running average (in red) are shown.

## Transmembrane Helix RMSD

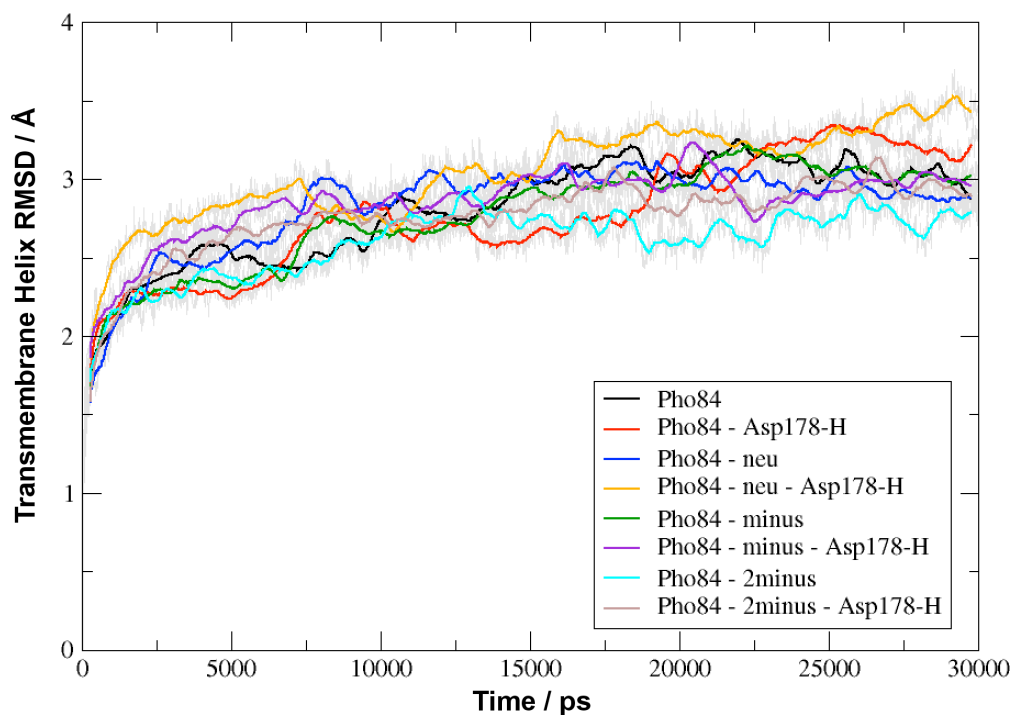

**Figure S17.** The RMSDs of the backbone (N, C $\alpha$ , and C atoms) of the transmembrane helices in various Pho84 simulations using 30 ns of equilibration (in gray) and a 50 point running average. Residues belonging to transmembrane regions are presented in Table 1 in the main paper and were previously proposed by Lagerstedt and co-workers (Lagerstedt, J. O.; Voss, J. C.; Wieslander, Å.; Persson, B. L. *FEBS Lett.* **2004**, 578, 262-268.)



## Atomic Distances

### $P_i$ - Lys<sup>492</sup> & $P_i$ - Asp<sup>178</sup>/Asp<sup>178</sup>-H

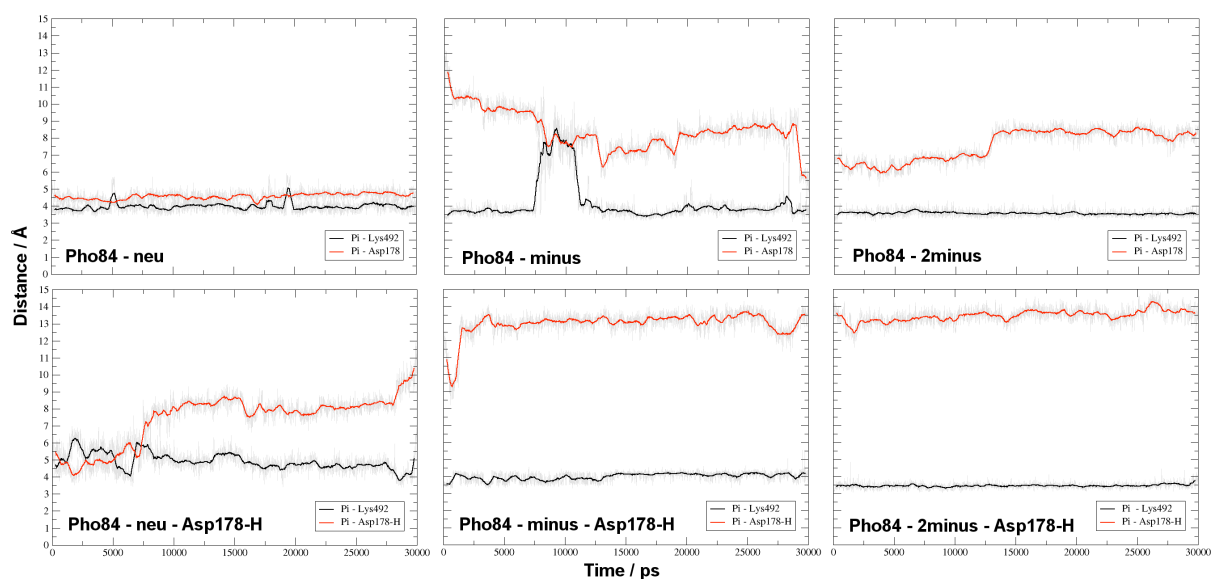

**Figure S18.** MD equilibration data for 30 ns simulations showing the variation in the atomic distances between the central phosphorus atom of  $P_i$  and the side chain nitrogen atom of Lys<sup>492</sup> and between the central atom of  $P_i$  and the side chain carboxylic acid carbon of Asp<sup>178</sup> or of Asp<sup>178</sup>-H during equilibration (in gray). Data are also presented as a running average of 50 data points (in red). For a detailed description of each system, refer to the figure legends for Figures S1-S8.

Asp<sup>178</sup>/Asp<sup>178</sup>-H - Asp<sup>76</sup>

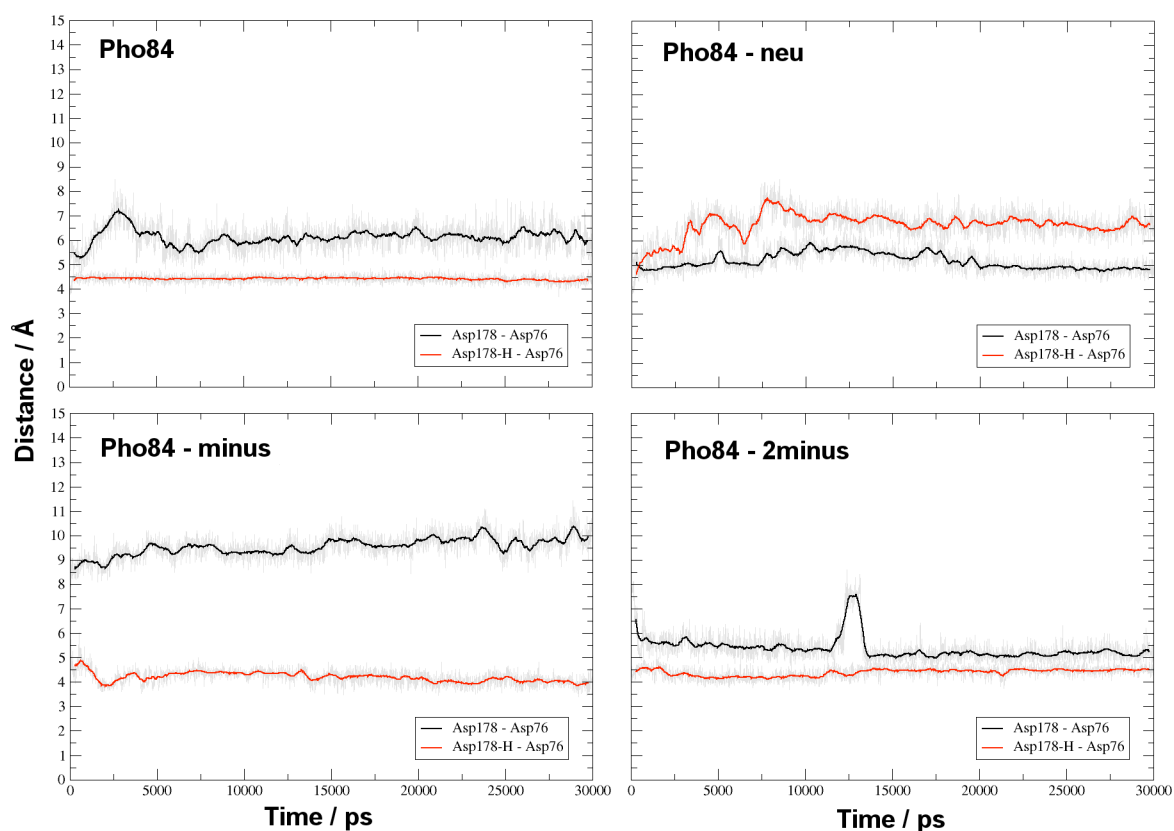

**Figure S19.** MD equilibration data extracted from 30 ns simulations showing the variation in the atomic distances between the the side chain carboxylic acid carbons of Asp<sup>178</sup> or Asp<sup>178</sup>-H and the side chain carboxylic acid carbon of Asp<sup>76</sup> during equilibration (in gray) Data are also presented as a running average of 50 data points (in red). For a detailed description of each system, refer to the figure legends for Figures S1-S8.

P<sub>i</sub> - Tyr<sup>179</sup>

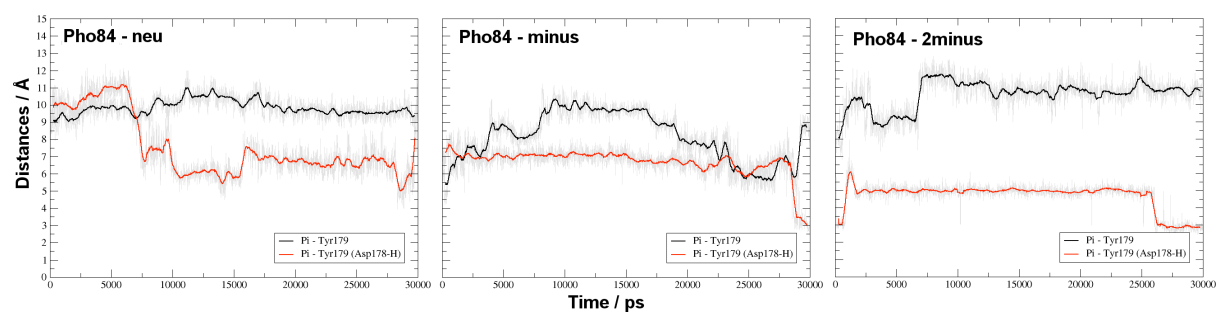

**Figure S20.** MD equilibration data extracted from 30 ns simulations showing variation in the atomic distances between the central phosphorus atom of P<sub>i</sub> and the side chain hydroxyl group hydrogen atom of Tyr<sup>179</sup> during equilibration (in gray). Data are also presented as a running average of 50 data points (in red). For a detailed description of each system, refer to the figure legends for Figures S1-S8.

## SMD Simulation Data

### Force Profiles:

*Pho84 – neu / Pho84 – minus – Asp178-H / Pho84 – minus*

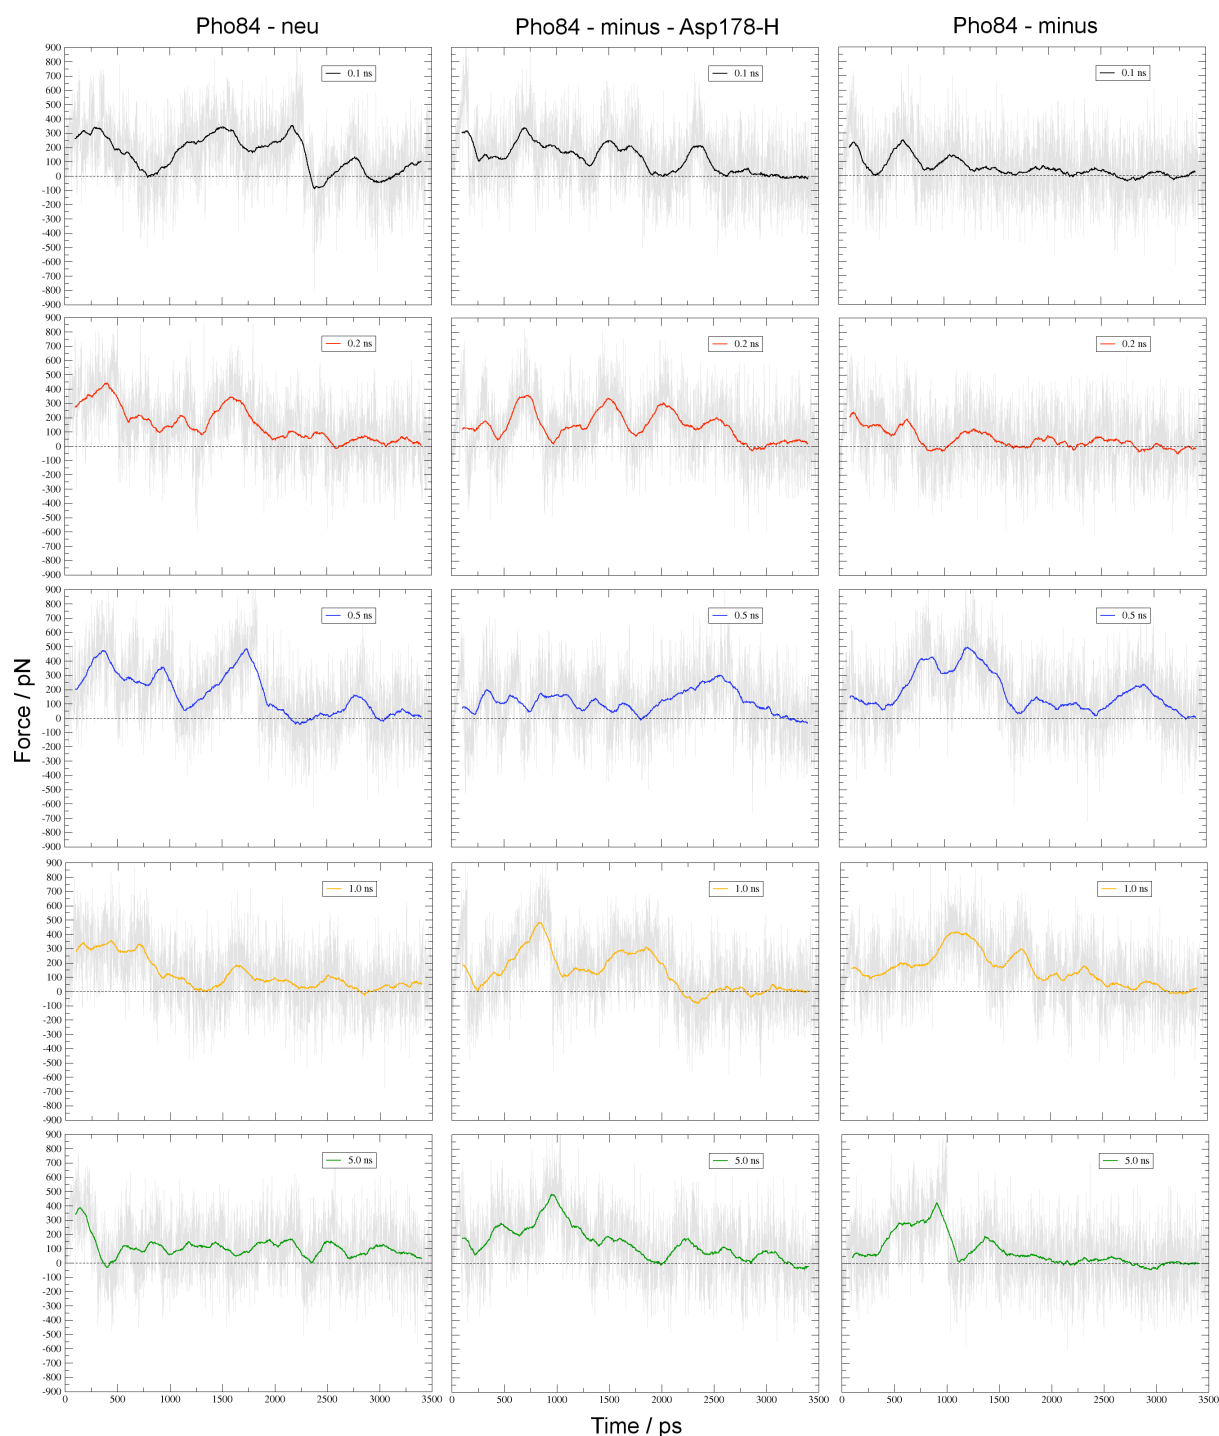

**Figure S21.** Force profiles derived from simulations of the cytosolic release of various protonation states of P<sub>i</sub> from Pho84: H<sub>3</sub>PO<sub>4</sub> (Pho84 – neu); H<sub>2</sub>PO<sub>4</sub><sup>-</sup>, and protonated Asp<sup>178</sup>-H (Pho84 – minus – Asp178-H); or H<sub>2</sub>PO<sub>4</sub><sup>-</sup> (Pho84 – minus). Various equilibration times were implemented (black line: 0.1 ns, red line: 0.2 ns, blue line: 0.5 ns, orange line: 1.0 ns, and green line: 5.0 ns) prior to increasing the distance between the central phosphorus atom of P<sub>i</sub> and the side chain nitrogen atom of Lys<sup>492</sup> for 3.5 ns using constant velocity SMD. The data is depicted as a running average of 200 data points.

*Pho84 – 2minus*

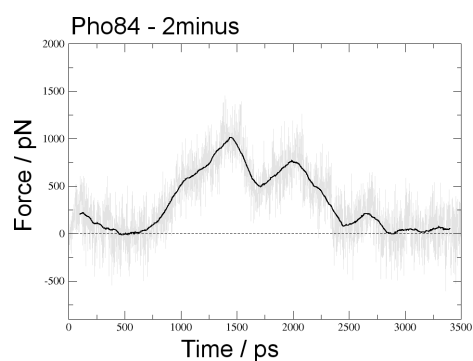

**Figure S22.** The force profile derived from a simulation of the cytosolic release of  $\text{HPO}_4^{2-}$  from Pho84 (Pho84 – 2minus). A 0.1 ns equilibration time was implemented prior to increasing the distance between the central phosphorus atom of  $\text{P}_i$  and the side chain nitrogen atom of Lys<sup>492</sup> for 3.5 ns using constant velocity SMD. The data is depicted as a running average of 200 data points (black line).

Work Profiles:

*Pho84 – neu / Pho84 – minus – Asp178-H / Pho84 - minus*

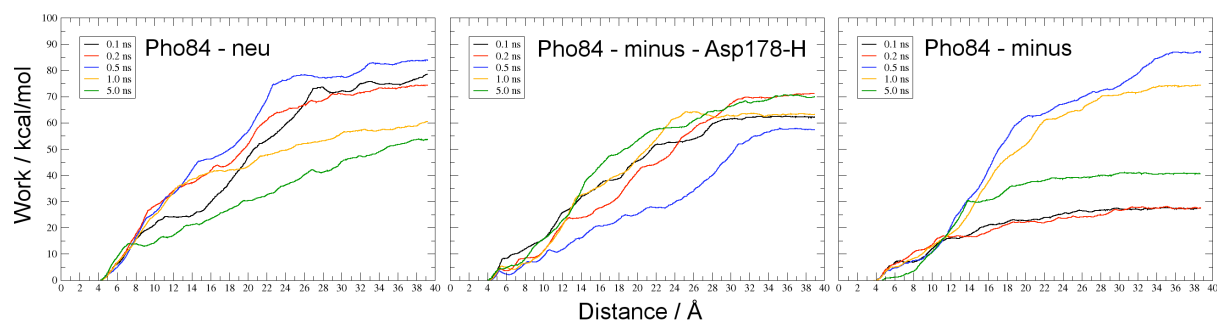

**Figure S23.** Work profiles derived from simulations of the cytosolic release of different protonation states of P<sub>i</sub> from Pho84: H<sub>3</sub>PO<sub>4</sub> (Pho84 – neu); H<sub>2</sub>PO<sub>4</sub><sup>-</sup> and a protonated Asp178-H (Pho84 – minus – Asp178-H); or H<sub>2</sub>PO<sub>4</sub><sup>-</sup> (Pho84 – minus). Various equilibration times were implemented (black line: 0.1 ns, red line: 0.2 ns, blue line: 0.5 ns, orange line: 1.0 ns, and green line: 5.0 ns) prior to increasing the distance between the central phosphorus atom of P<sub>i</sub> and the side chain nitrogen atom of Lys<sup>492</sup> for 3.5 ns using constant velocity SMD.

*Pho84 – 2minus*

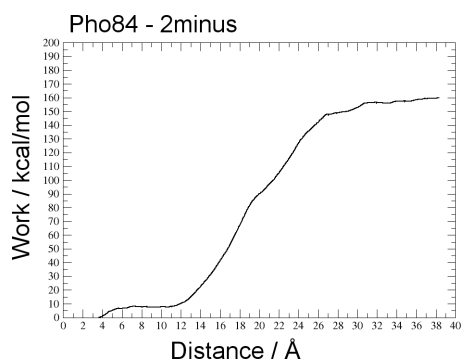

**Figure S24.** Work profile derived from a simulation of the cytosolic release of HPO<sub>4</sub><sup>2-</sup> from Pho84 (Pho84 – 2minus). A 0.1 ns equilibration time was implemented prior to increasing the distance between the central phosphorus atom of P<sub>i</sub> and the side chain nitrogen atom of Lys<sup>492</sup> for 3.5 ns using constant velocity SMD.

Pho84 Residue-P<sub>i</sub> Hydrogen Bonding:

*Pho84 – neu*

**Table S2.** Hydrogen bonding (using 3.0Å and 20° interaction cut-offs) as a percentage of the total simulation time for the cytosolic release of H<sub>3</sub>PO<sub>4</sub> from Pho84 (Pho84 – neu) using a 0.1, 0.2, 0.5, 1.0, or 5.0 ns equilibration stage prior to increasing the distance between the central phosphorus atom of P<sub>i</sub> and the side chain nitrogen atom of Lys<sup>492</sup> for 3.5 ns using constant velocity steered molecular dynamics. Only extracted values ≥1% are presented.

| Residue | Fragment <sup>a</sup> | H-bonding (%) |        |        |        |        |
|---------|-----------------------|---------------|--------|--------|--------|--------|
|         |                       | 0.1 ns        | 0.2 ns | 0.5 ns | 1.0 ns | 5.0 ns |
| Gln119  | H-II                  | 3.0           | 7.0    | 5.3    | 3.9    | 4.7    |
| Asp127  | L-II                  |               | 3.9    |        |        |        |
| Gly176  | H-IV                  | 6.1           | 5.9    | 7.9    | 6.1    | 1.6    |
| Asp178  | H-IV                  | 4.7           | 3.4    | 3.6    | 3.6    |        |
| Ser183  | H-IV                  |               |        |        |        | 2.1    |
| Leu286  | L-VI                  |               | 3.7    |        |        |        |
| Gln291  | L-VI                  |               |        |        |        | 1.0    |
| Hie300  | L-VI                  | 3.9           |        |        |        |        |
| Asp306  | L-VI                  |               |        |        | 2.4    |        |
| Gly311  | L-VI                  |               |        | 4.7    |        |        |
| Glu313  | L-VI                  | 2.7           | 1.3    | 6.0    |        | 6.0    |
| Arg314  | L-VI                  | 1.4           |        |        |        | 1.0    |
| Ala315  | L-VI                  |               |        |        |        | 1.6    |
| Ser316  | L-VI                  | 1.0           |        |        |        |        |
| Thr317  | L-VI                  |               |        |        |        | 5.7    |
| Ala318  | L-VI                  | 2.4           |        |        |        | 7.3    |
| Glu320  | L-VI                  | 1.9           |        |        |        |        |
| Ser321  | L-VI                  | 2.3           |        |        |        | 4.0    |
| Leu322  | L-VI                  |               | 1.3    |        |        |        |
| Pro326  | L-VI                  |               |        | 2.4    |        |        |
| Lys328  | L-VI                  | 5.1           |        |        |        | 4.9    |
| Ser330  | L-VI                  | 4.1           | 3.6    | 2.0    |        | 1.3    |
| Phe331  | L-VI                  |               |        | 2.6    |        |        |
| Lys332  | L-VI                  |               |        |        |        |        |
| Asp333  | L-VI                  |               |        | 7.1    | 1.6    |        |
| Phe334  | L-VI                  |               |        | 2.1    | 3.7    |        |
| His337  | L-VI                  | 6.3           |        |        |        | 1.9    |
| Gln340  | L-VI                  | 2.0           |        |        |        |        |
| Arg478  | L-X                   |               |        |        | 2.0    |        |
| Tyr479  | H-XI                  |               |        | 1.6    |        |        |
| Glu551  | H-XII                 |               |        |        | 1.3    |        |

<sup>a</sup> Derived from the topological model of Pho84 previously presented by Lagerstedt et al. (Lagerstedt, J. O.; Voss, J. C.; Wieslander, Å.; Persson, B. L. *FEBS Lett.* **2004**, 578, 262-268.)

*Pho84 – minus – Asp178-H*

**Table S3.** Hydrogen bonding (using 3.0 Å and 20° interaction cut-offs) as a percentage of the total simulation time for the cytosolic release of H<sub>2</sub>PO<sub>4</sub><sup>-</sup> from Pho84 with protonated Asp<sup>178</sup> (Pho84 – minus – Asp178-H) using a 0.1, 0.2, 0.5, 1.0, or 5.0 ns equilibration stage prior to increasing the distance between the central phosphorus atom of P<sub>i</sub> and the side chain nitrogen atom of Lys<sup>492</sup> for 3.5 ns using constant velocity steered molecular dynamics. Only extracted values ≥1% are presented.

| Residue | Fragment <sup>a</sup> | H-bonding (%) |        |        |        |        |
|---------|-----------------------|---------------|--------|--------|--------|--------|
|         |                       | 0.1 ns        | 0.2 ns | 0.5 ns | 1.0 ns | 5.0 ns |
| Thr115  | H-II                  |               |        |        |        | 2.0    |
| Gln119  | H-II                  | 13.7          | 13.0   | 9.7    | 10.6   | 7.9    |
| Arg131  | H-III                 |               |        |        | 2.4    |        |
| Lys132  | H-III                 |               |        |        | 2.4    |        |
| Tyr179  | H-IV                  | 15.6          | 17.1   | 3.0    | 19.9   | 5.0    |
| Pro180  | H-IV                  |               | 1.6    |        |        |        |
| Ser183  | H-IV                  |               | 13.0   | 6.3    | 2.3    |        |
| Ser187  | L-IV                  |               |        | 4.4    |        |        |
| Thr192  | L-IV                  | 2.1           |        |        |        |        |
| Trp194  | L-IV                  | 4.3           |        |        |        |        |
| Arg275  | H-VI                  |               |        |        | 3.4    |        |
| Lys283  | L-VI                  |               |        |        | 4.4    |        |
| Glu285  | L-VI                  | 1.1           | 1.1    |        | 1.7    |        |
| Leu286  | L-VI                  |               | 2.0    | 8.6    |        |        |
| Ala287  | L-VI                  |               | 1.1    |        |        |        |
| Ala288  | L-VI                  |               |        | 1.0    |        |        |
| Ile299  | L-VI                  |               |        |        |        | 1.0    |
| Glu313  | L-VI                  |               |        |        |        | 1.7    |
| Arg314  | L-VI                  | 6.3           |        |        | 2.6    | 15.6   |
| Thr317  | L-VI                  |               |        |        |        | 1.6    |
| Ser330  | L-VI                  |               |        |        | 2.0    |        |
| Lys332  | L-VI                  | 4.6           | 15.4   | 10.3   | 8.6    |        |
| Asp333  | L-VI                  | 2.6           | 5.9    | 7.3    |        |        |
| Trp341  | L-VI                  |               |        |        |        | 3.9    |
| Lys342  | L-VI                  |               |        |        |        | 1.0    |
| Arg478  | L-X                   | 10.4          |        | 5.0    |        |        |
| Ser481  | H-XI                  | 13.7          |        |        |        |        |
| His484  | H-XI                  | 4.7           | 4.0    | 3.1    | 2.9    |        |
| Lys492  | H-XI                  | 2.1           | 1.0    | 1.4    | 1.1    | 1.0    |

<sup>a</sup> Derived from the topological model of Pho84 previously presented by Lagerstedt et al. (Lagerstedt, J. O.; Voss, J. C.; Wieslander, Å.; Persson, B. L. *FEBS Lett.* **2004**, 578, 262-268.)



*Pho84 – minus*

**Table S4.** Hydrogen bonding (using 3.0 Å and 20° interaction cut-offs) as a percentage of the total simulation time for the cytosolic release of H<sub>2</sub>PO<sub>4</sub><sup>-</sup> from Pho84 (Pho84 – minus) using a 0.1, 0.2, 0.5, 1.0, or 5.0 ns equilibration stage prior to increasing the distance between the central phosphorus atom of P<sub>i</sub> and the side chain nitrogen atom of Lys<sup>492</sup> for 3.5 ns using constant velocity steered molecular dynamics. Only extracted values ≥1% are presented.

| Residue | Fragment <sup>a</sup> | H-bonding (%) |        |        |        |        |
|---------|-----------------------|---------------|--------|--------|--------|--------|
|         |                       | 0.1 ns        | 0.2 ns | 0.5 ns | 1.0 ns | 5.0 ns |
| Ala69   | H-I                   |               |        |        | 1.1    |        |
| Gly72   | H-I                   |               |        |        | 2.4    |        |
| Gln119  | H-II                  |               |        | 3.1    |        |        |
| Arg131  | H-III                 |               |        |        | 1.6    |        |
| Tyr135  | H-III                 |               |        |        | 1.0    |        |
| Ile175  | H-IV                  | 3.3           | 1.7    | 1.7    | 3.3    |        |
| Asp178  | H-IV                  |               | 1.3    | 1.6    | 10.7   |        |
| Tyr179  | H-IV                  | 3.4           | 2.6    |        |        |        |
| Ser182  | H-IV                  | 1.1           | 2.3    |        | 6.3    |        |
| Ser183  | H-IV                  | 5.1           | 3.6    |        |        |        |
| Ile185  | H-IV                  |               |        |        | 2.7    |        |
| Ser187  | L-IV                  |               | 2.3    |        |        |        |
| Arg195  | L-IV                  |               |        |        |        | 8.6    |
| Ser273  | H-VI                  |               |        |        | 1.3    |        |
| Asp279  | L-VI                  |               |        |        | 8.6    |        |
| Asn281  | L-VI                  |               |        |        | 2.9    |        |
| Lys283  | L-VI                  |               |        |        | 2.1    |        |
| Gln291  | L-VI                  |               |        | 10.9   |        |        |
| Glu292  | L-VI                  |               |        | 4.6    |        |        |
| Gln293  | L-VI                  |               |        | 3.3    |        |        |
| Asp306  | L-VI                  |               | 1.0    |        |        |        |
| Ser316  | L-VI                  |               |        | 11.4   |        |        |
| Glu320  | L-VI                  |               | 1.1    |        |        |        |
| Ser321  | L-VI                  |               | 1.1    |        |        |        |
| Lys332  | L-VI                  | 3.0           | 2.1    | 1.1    |        |        |
| Cys335  | L-VI                  |               | 1.0    |        |        |        |
| Arg336  | L-VI                  | 6.9           | 5.3    |        |        | 8.7    |
| Thr477  | L-X                   | 2.6           |        |        |        | 1.3    |
| Ser481  | H-XI                  | 12.1          |        |        |        | 6.1    |
| Ala488  | H-XI                  |               |        |        |        | 1.9    |
| Lys492  | H-XI                  | 1.1           | 1.3    |        | 2.4    |        |
| Glu551  | H-XII                 |               |        |        |        | 3.0    |

<sup>a</sup> Derived from the topological model of Pho84 previously presented by Lagerstedt et al. (Lagerstedt, J. O.; Voss, J. C.; Wieslander, Å.; Persson, B. L. *FEBS Lett.* **2004**, 578, 262-268.)

*Pho84 – 2minus*

**Table S5.** Hydrogen bonding (using 3.0 Å and 20° interaction cut-offs) as a percentage of the total simulation time for the cytosolic release of HPO<sub>4</sub><sup>2-</sup> from Pho84 (Pho84 – 2minus) using a 0.1 ns equilibration stage prior to increasing the distance between the central phosphorus atom of P<sub>i</sub> and the side chain nitrogen atom of Lys492 for 3.5 ns using constant velocity steered molecular dynamics. Only extracted values ≥1% are presented.

| <b>Residue</b> | <b>Fragment<sup>a</sup></b> | <b>H-bonding (%)</b> |
|----------------|-----------------------------|----------------------|
| Thr115         | H-II                        | 29.4                 |
| Gln119         | H-II                        | 14.7                 |
| Thr124         | H-II                        | 13.3                 |
| Lys297         | L-VI                        | 2.4                  |
| Arg314         | L-VI                        | 39.9                 |
| Thr317         | L-VI                        | 13.6                 |
| Lys332         | L-VI                        | 15.9                 |

<sup>a</sup> Derived from the topological model of Pho84 previously presented by Lagerstedt et al. (Lagerstedt, J. O.; Voss, J. C.; Wieslander, Å.; Persson, B. L. *FEBS Lett.* **2004**, 578, 262-268.)

Pho84 Residue-P<sub>i</sub> Hydrogen Bond Formation and Disruption Lifetime:

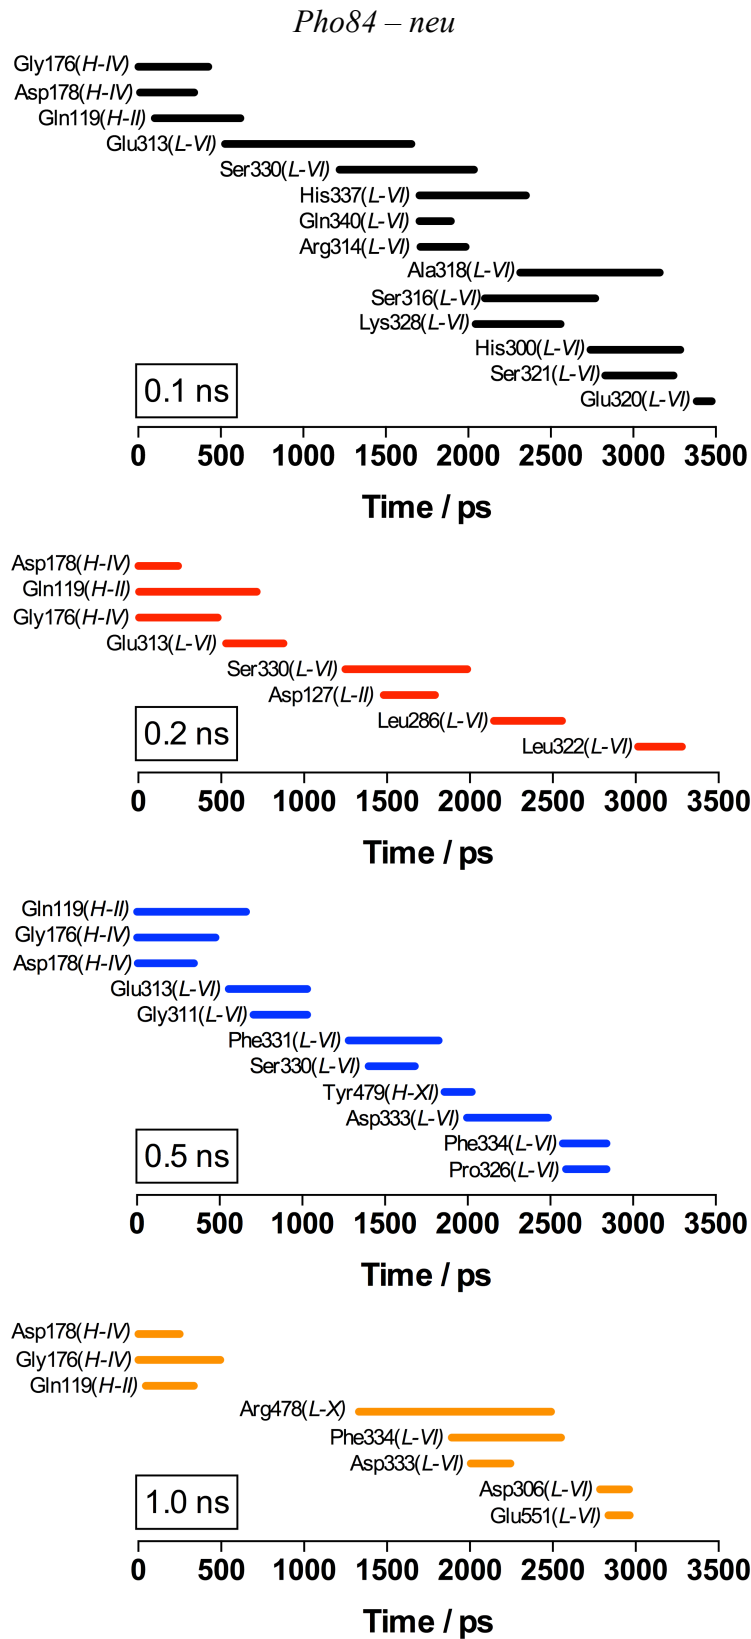

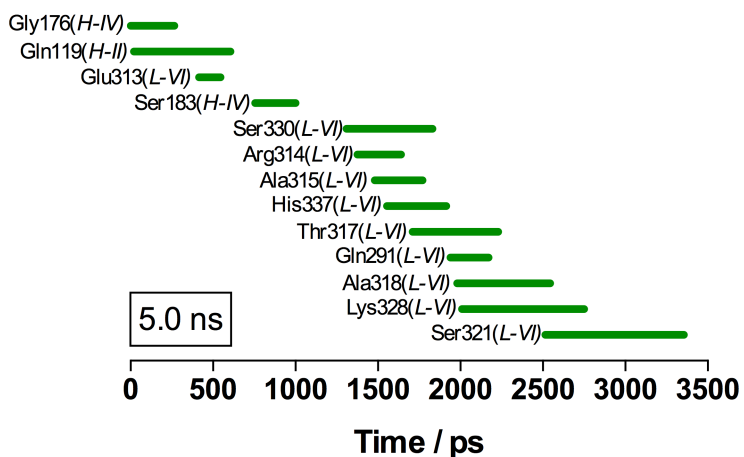

**Figure S25.** Hydrogen bond formation and disruption lifetime (using 3.0 Å and 20° interaction cut-offs) for the cytosolic release of H<sub>3</sub>PO<sub>4</sub> from Pho84 (Pho84 – neu) using 0.1, 0.2, 0.5, 1.0, or 5.0 ns equilibration stage prior to increasing the distance between the central phosphorus atom of P<sub>i</sub> and the side chain nitrogen atom of Lys<sup>492</sup> for 3.5 ns using constant velocity SMD.

*Pho84 – minus – Asp178-H*

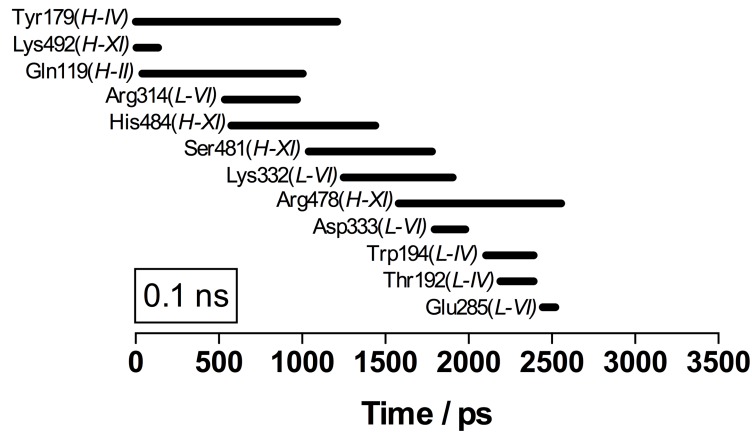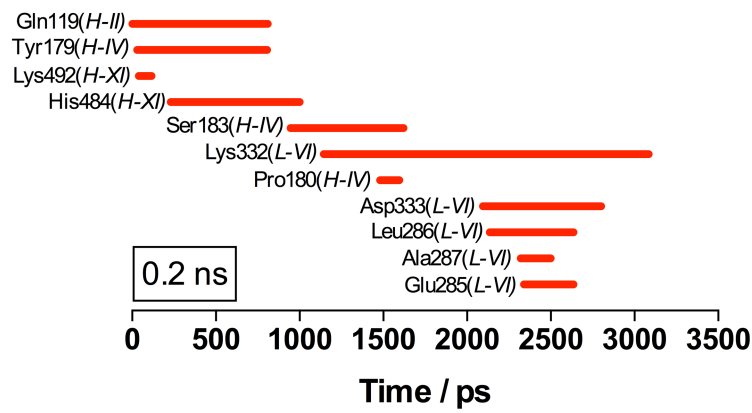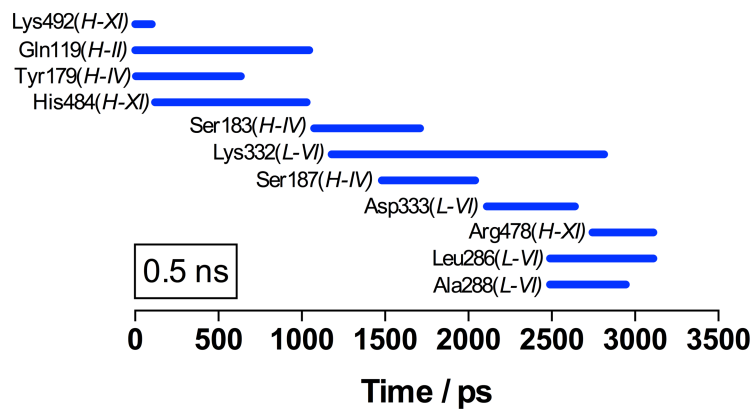

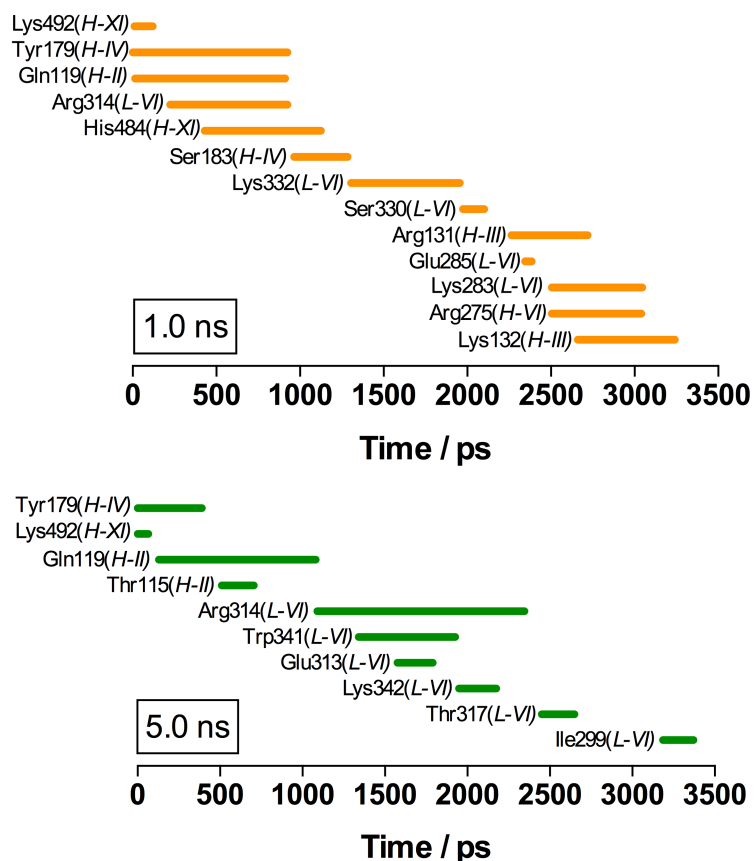

**Figure S26.** Hydrogen bond formation and disruption lifetime (using 3.0 Å and 20° interaction cut-offs) for the cytosolic release of H<sub>2</sub>PO<sub>4</sub><sup>-</sup> from Pho84 with protonated Asp<sup>178</sup> (Pho84 – minus – Asp178-H) using a 0.1, 0.2, 0.5, 1.0, or 5.0 ns equilibration stage prior to increasing the distance between the central phosphorus atom of P<sub>i</sub> and the side chain nitrogen atom of Lys<sup>492</sup> for 3.5 ns using constant velocity SMD.

*Pho84 – minus*

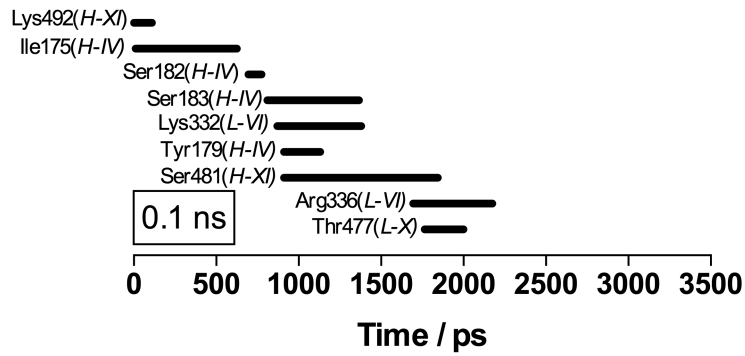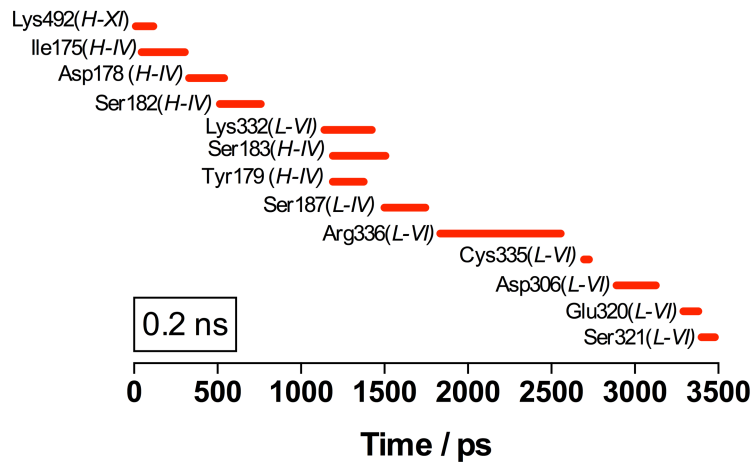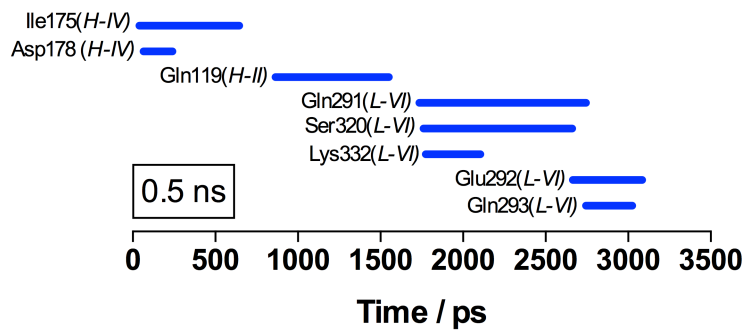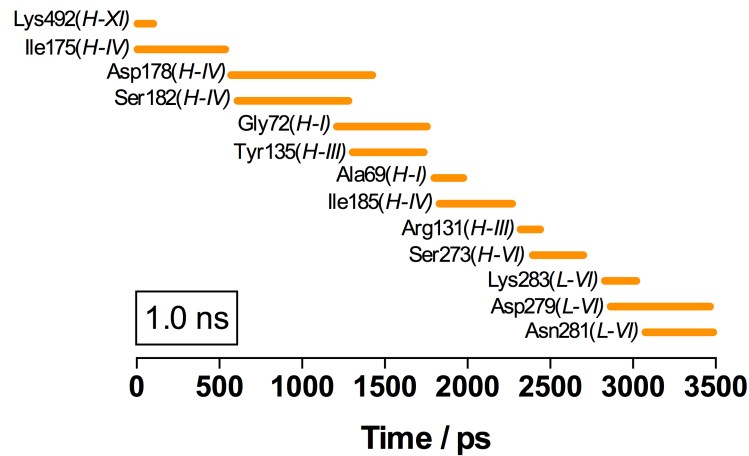

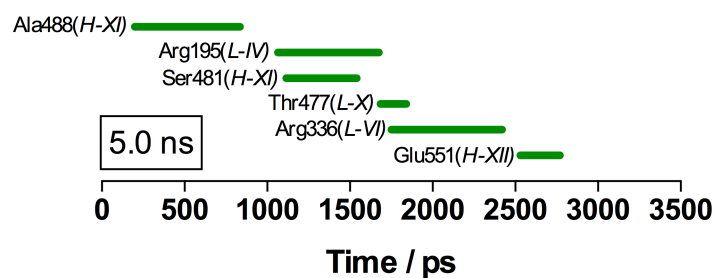

**Figure S27.** Hydrogen bond formation and disruption lifetime (using 3.0 Å and 20° interaction cut-offs) for the cytosolic release of H<sub>2</sub>PO<sub>4</sub><sup>-</sup> from Pho84 (Pho84 – minus) using a 0.1, 0.2, 0.5, 1.0, or 5.0 ns equilibration stage prior to increasing the distance between the central phosphorus atom of P<sub>i</sub> and the side chain nitrogen atom of Lys<sup>492</sup> for 3.5 ns using constant velocity SMD.

*Pho84 – 2minus*

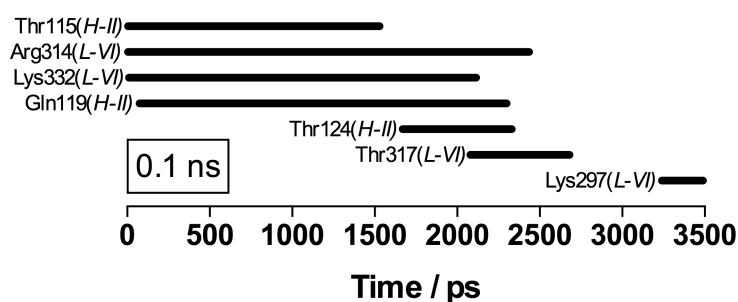

**Figure S28.** Hydrogen bond formation and disruption lifetime (using 3.0 Å and 20° interaction cut-offs) for the cytosolic release of HPO<sub>4</sub><sup>2-</sup> from Pho84 (Pho84 – 2minus) using a 0.1 ns equilibration stage prior to increasing the distance between the central phosphorus atom of P<sub>i</sub> and the side chain nitrogen atom of Lys<sup>492</sup> for 3.5 ns using constant velocity SMD.



## Water-P<sub>i</sub> Hydrogen Bonding:

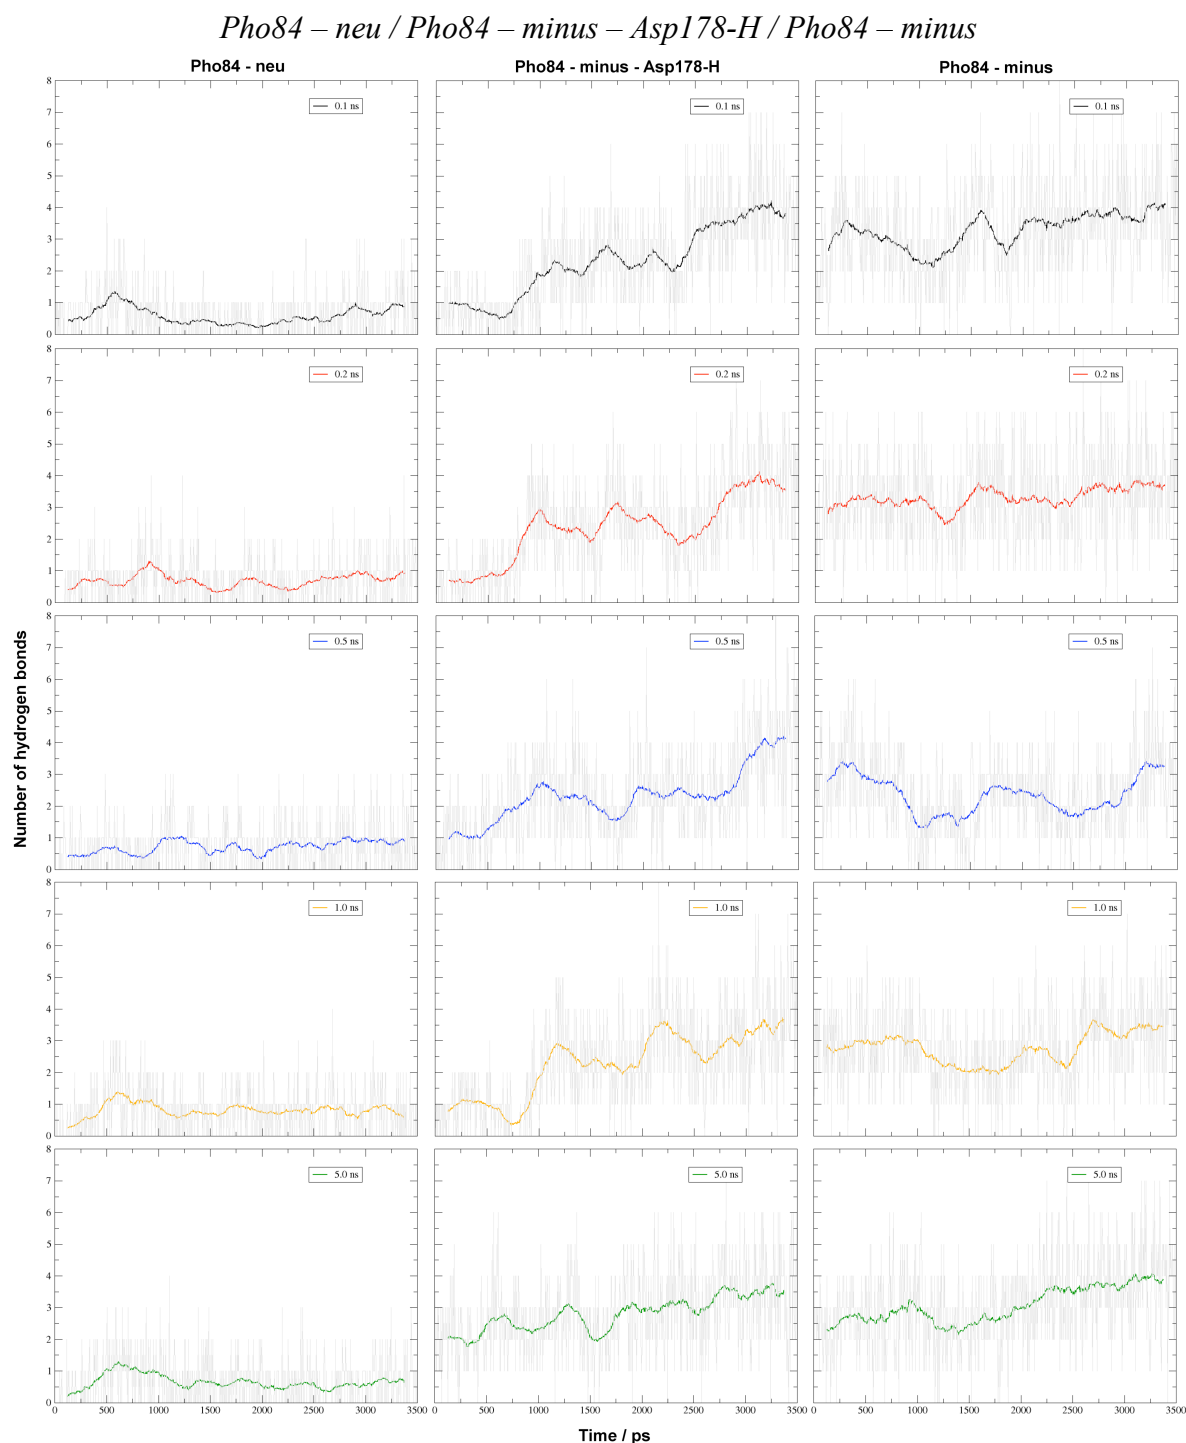

**Figure S29.** Water-P<sub>i</sub> hydrogen bonding profiles (using 3.0Å and 20° interaction cut-offs) derived from simulations of the cytosolic release of various protonation states of P<sub>i</sub> from Pho84: H<sub>3</sub>PO<sub>4</sub> (Pho84 – neu); H<sub>2</sub>PO<sub>4</sub><sup>-</sup> and protonated Asp<sup>178</sup>-H (Pho84 – minus – Asp178-H); or H<sub>2</sub>PO<sub>4</sub><sup>-</sup> (Pho84 – minus). The various equilibration times were implemented (black line: 0.1 ns, red line: 0.2 ns, blue line: 0.5 ns, orange line: 1.0 ns, and green line: 5.0 ns) prior to increasing the distance between the central phosphorus atom of P<sub>i</sub> and the side chain nitrogen atom of Lys<sup>492</sup> for 3.5 ns using constant velocity SMD. Data are depicted as a running average of 50 data points.

*Pho84 – 2minus*

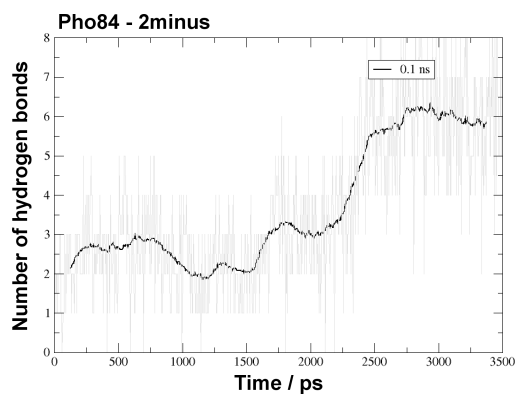

**Figure S30.** A water-P<sub>i</sub> hydrogen bonding profile (using 3.0 Å and 20° interaction cut-offs) derived from a simulation of the cytosolic release of HPO<sub>4</sub><sup>2-</sup> from Pho84 (Pho84 – 2minus). A 0.1 ns equilibration time was implemented prior to increasing the distance between the central phosphorus atom of P<sub>i</sub> and the side chain nitrogen atom of Lys<sup>492</sup> for 3.5 ns using constant velocity SMD. Data are depicted as a running average of 50 data points (black line).

Release Routes:

*Pho84 – neu*

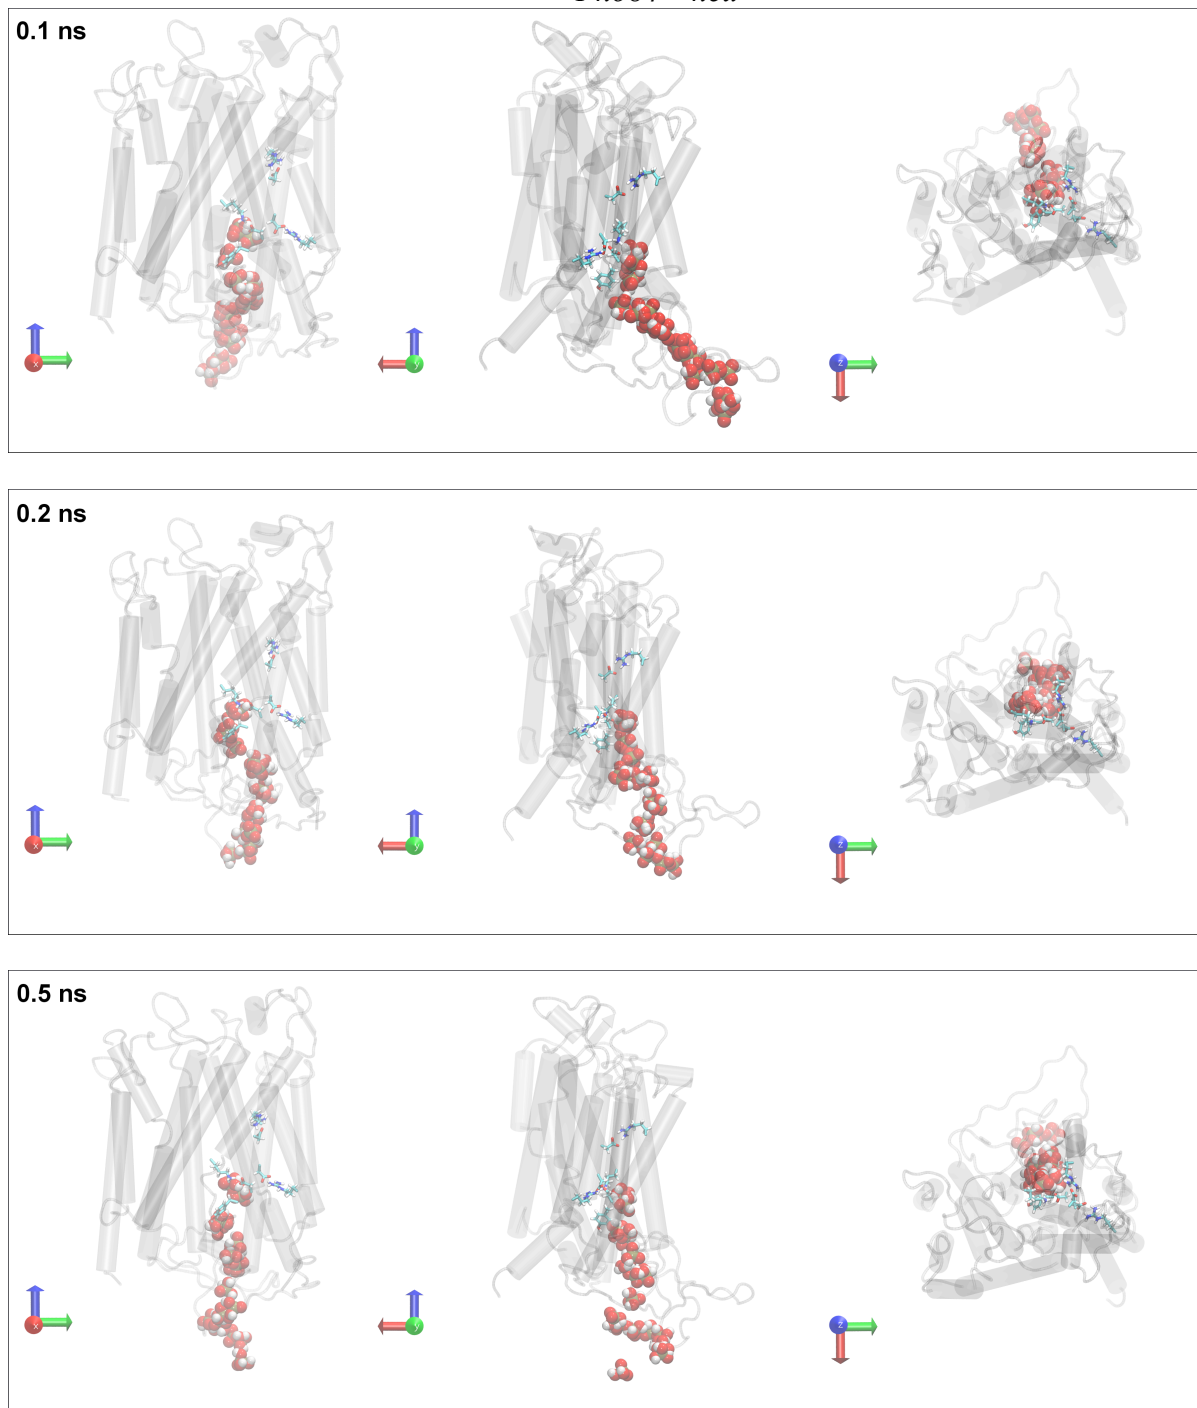

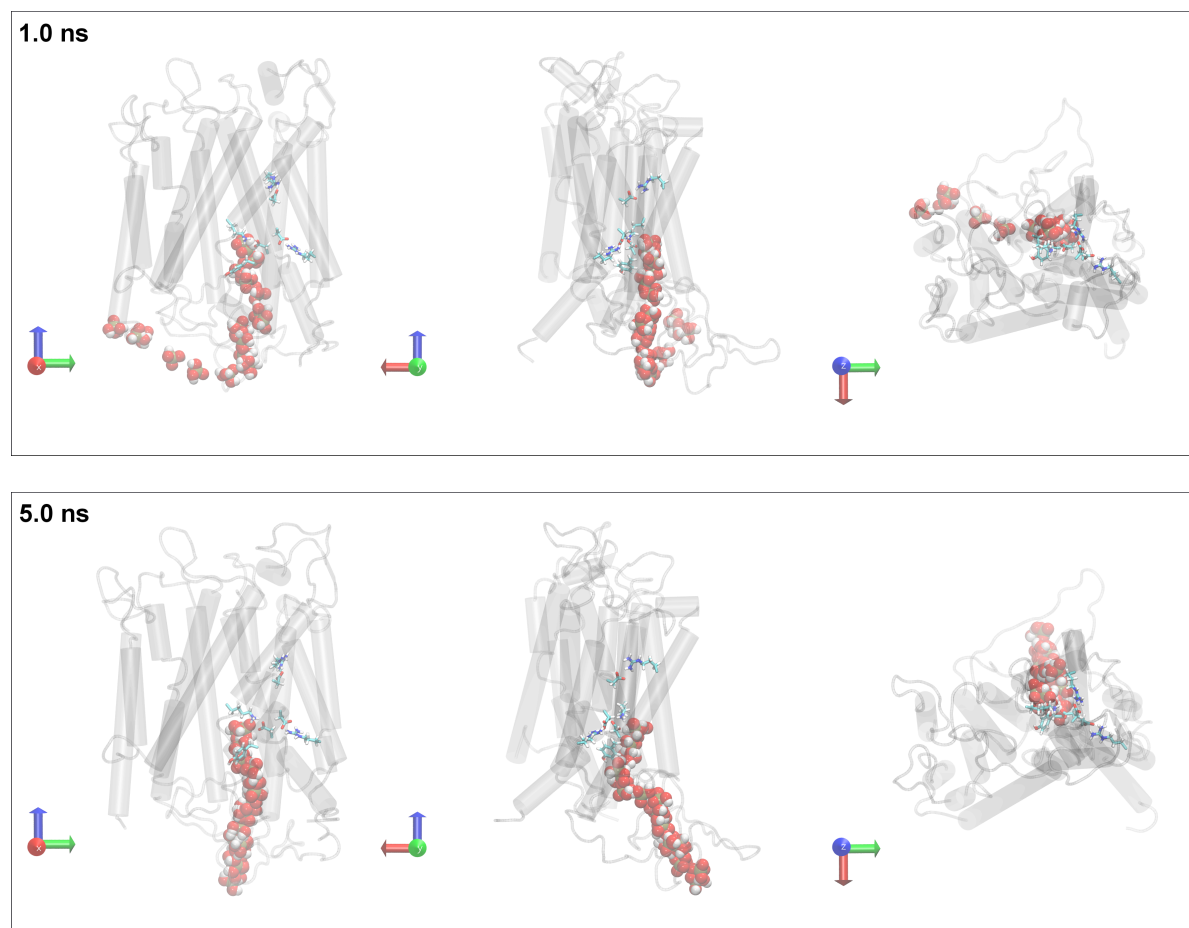

**Figure S31.** Snapshots derived from SMD simulations of Pho84 obtained prior to 3.5 ns of simulation and multiple structures with H<sub>3</sub>PO<sub>4</sub> (Pho84 – neu) extracted every 0.175 ns (van der Waal volume representations). SMD simulations were performed after initially restraining the Lys<sup>492</sup>-P<sub>i</sub> distance for 0.1, 0.2, 0.5, 1.0, or 5.0 ns. Residues shown (licorice representations) are those that are proposed to be important for binding P<sub>i</sub> (Lys<sup>492</sup>, Asp<sup>178</sup>, Tyr<sup>179</sup>) and those that are involved in proton transfer (Asp<sup>76</sup>, Asp<sup>79</sup>, Asp<sup>178</sup>, Arg<sup>168</sup>, and Arg<sup>267</sup>). The coordinate axes are shown in green (x-axis), red (y-axis), and blue (z-axis).

*Pho84 – minus – Asp178-H*

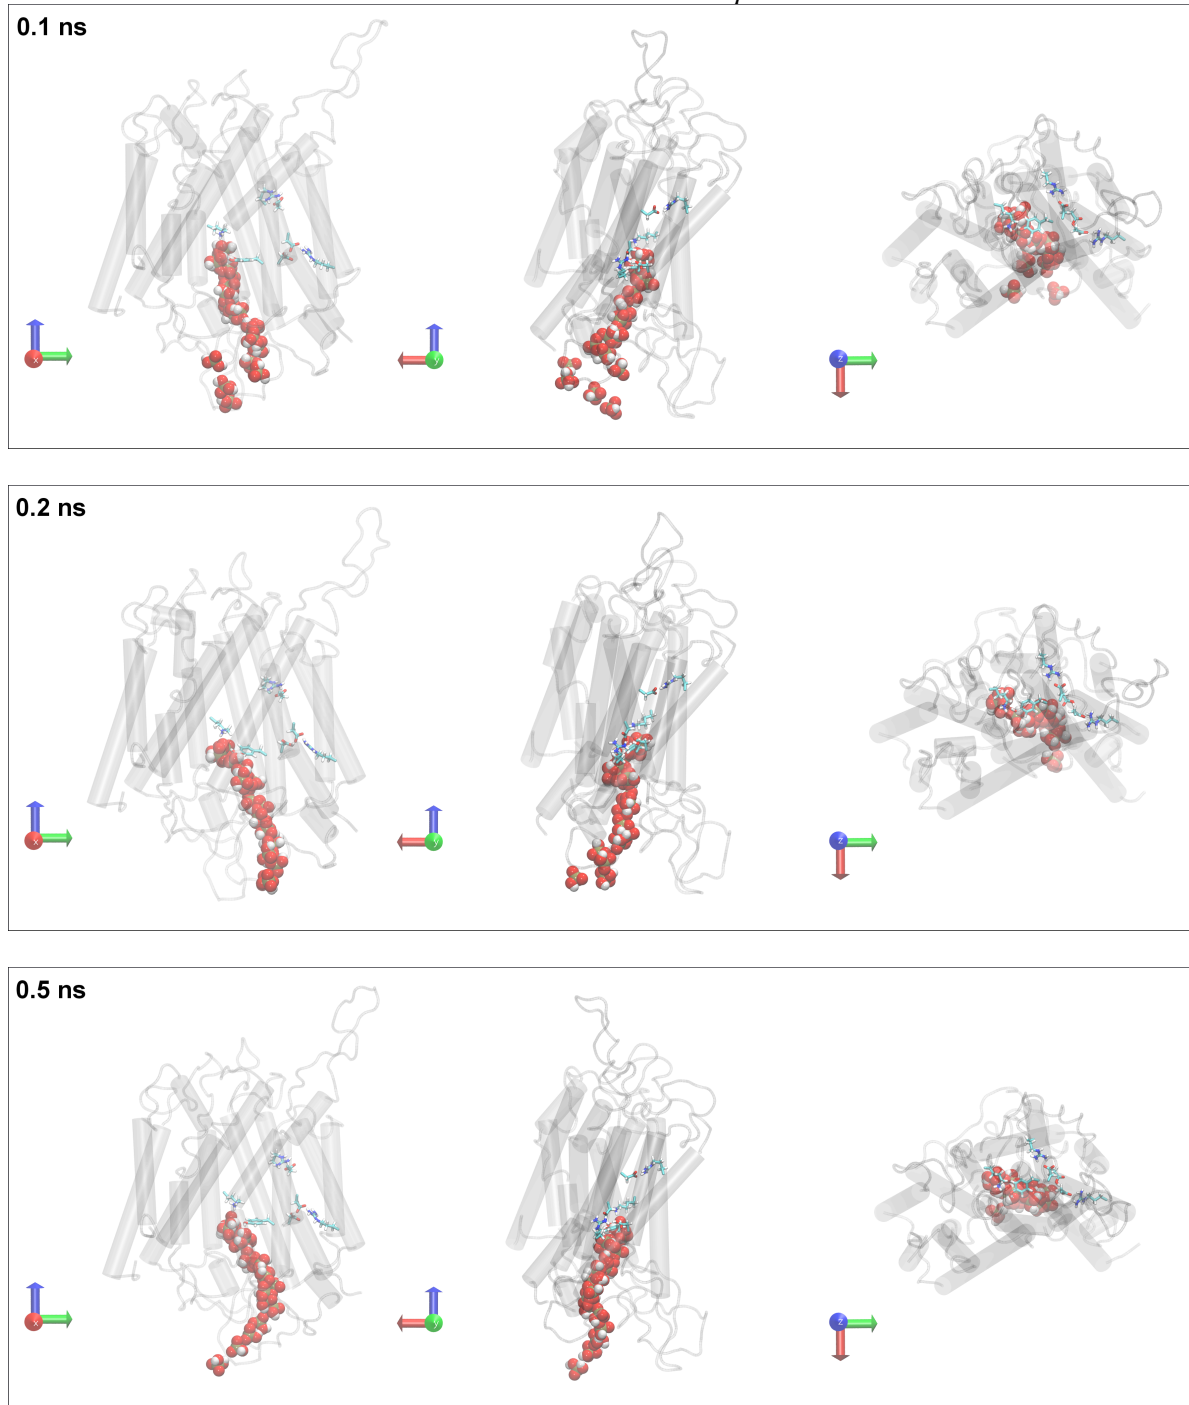

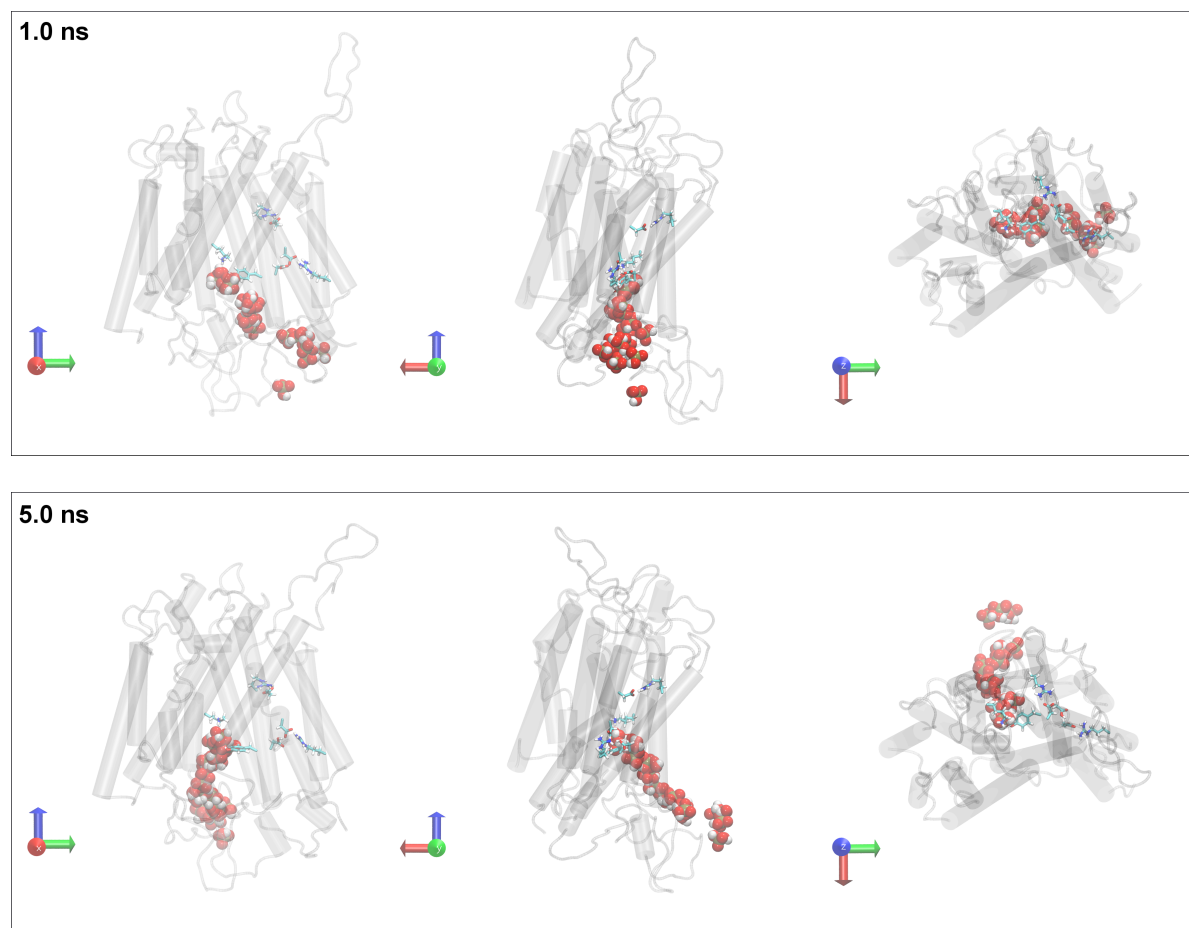

**Figure S32.** Snapshots derived from SMD simulations of Pho84 obtained prior to 3.5 ns of simulation and multiple structures with  $\text{H}_2\text{PO}_4^-$  and protonated Asp<sup>178</sup>-H (Pho84 – minus – Asp178-H) extracted every 0.175 ns (h van der Waal volume representations). SMD simulations were performed after initially restraining the Lys<sup>492</sup>-P<sub>i</sub> distance for 0.1, 0.2, 0.5, 1.0, or 5.0 ns. Residues shown (licorice representations) are those proposed to be important for binding P<sub>i</sub> (Lys<sup>492</sup>, Asp<sup>178</sup>, Tyr<sup>179</sup>) and those that are involved in proton transfer (Asp<sup>76</sup>, Asp<sup>79</sup>, Asp<sup>178</sup>, Arg<sup>168</sup>, and Arg<sup>267</sup>). The coordinate axes are shown in green (x-axis), red (y-axis), and blue (z-axis).

*Pho84 – minus*

0.1 ns

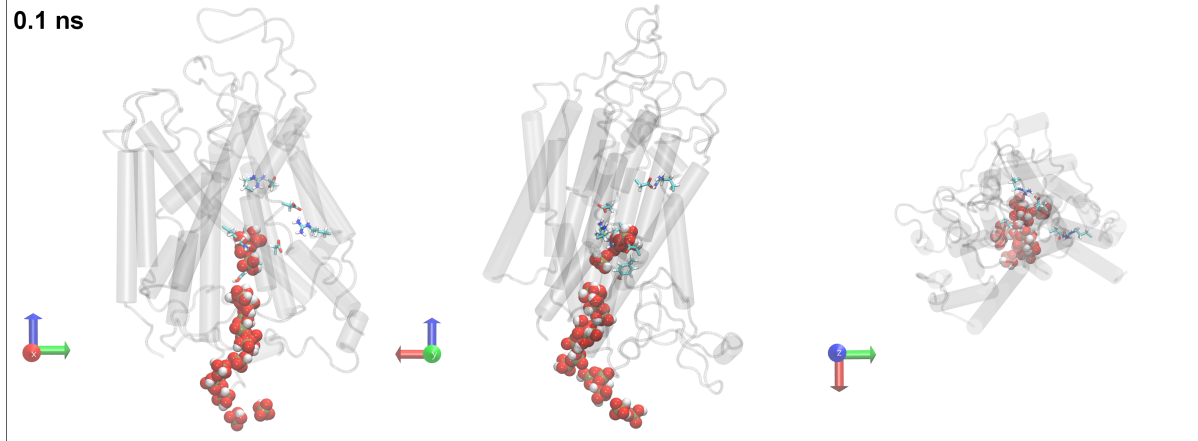

0.2 ns

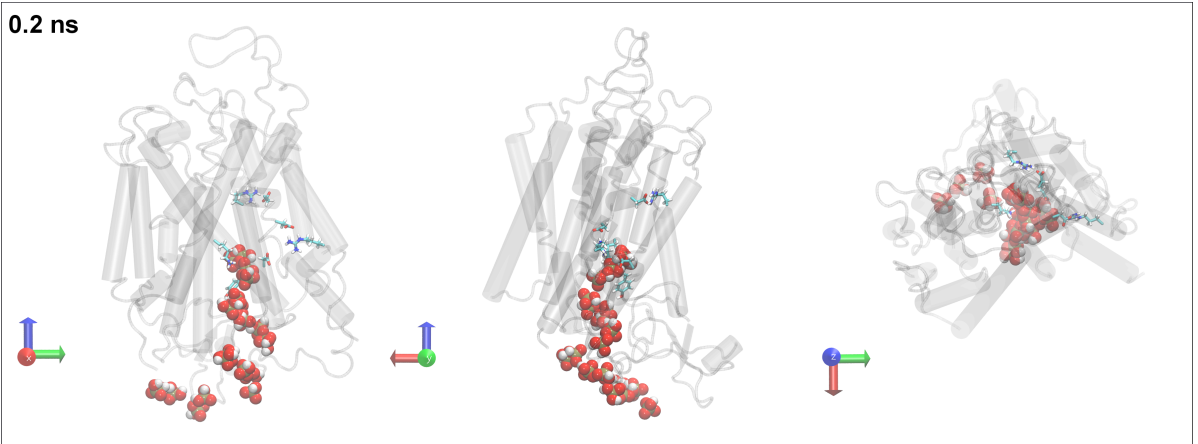

0.5 ns

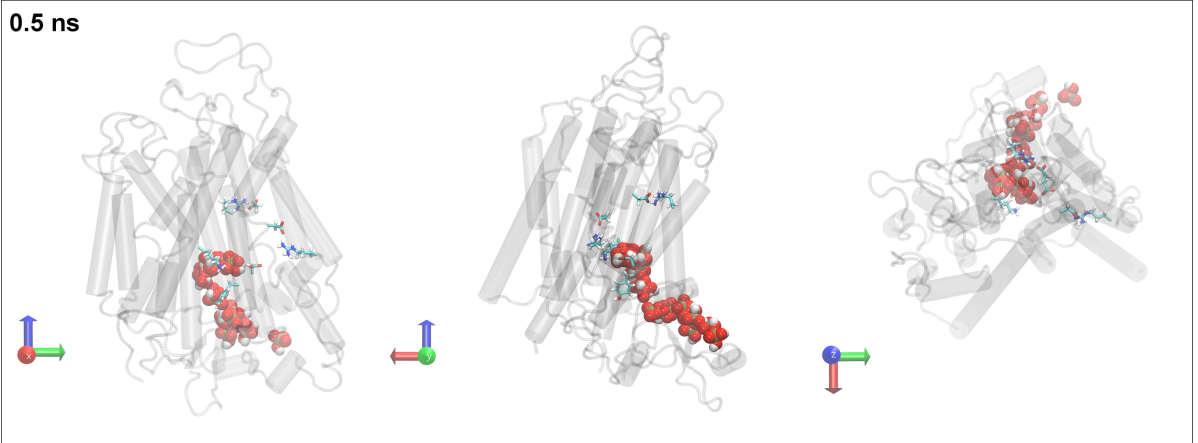



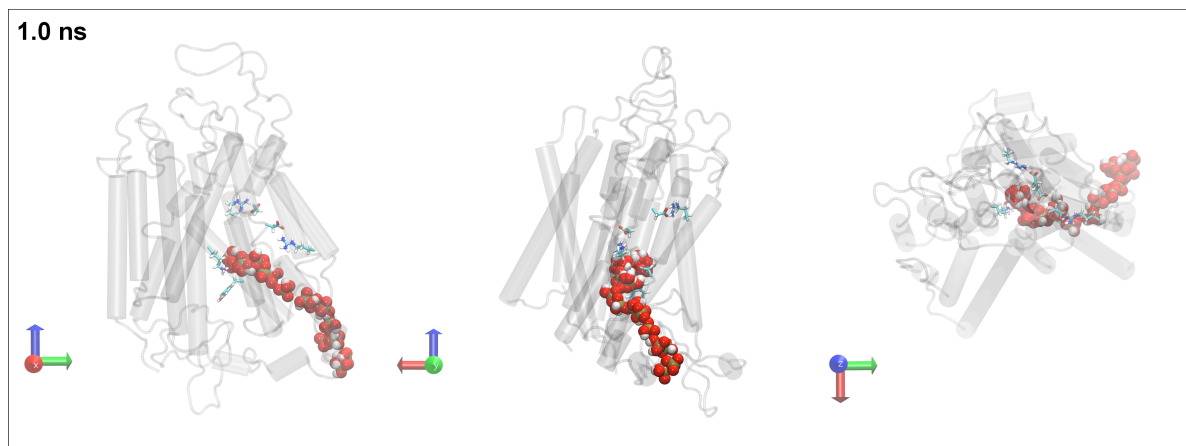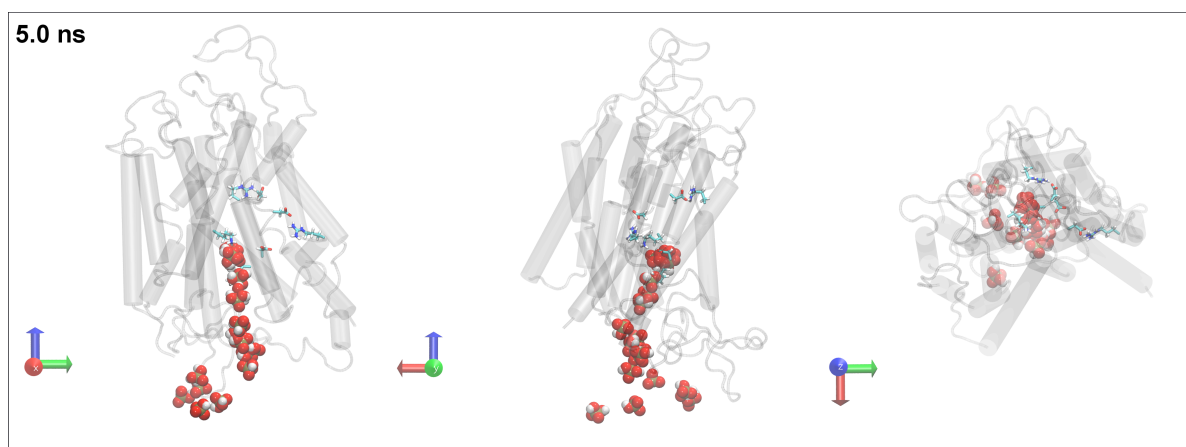

**Figure S33.** Snapshots derived from SMD simulations of Pho84 obtained prior to 3.5 ns of simulation and multiple structures with  $\text{H}_2\text{PO}_4^-$  (Pho84 – minus) extracted every 0.175 ns (van der Waal volume representations). SMD simulations were performed after initially restraining the Lys<sup>492</sup>-P<sub>i</sub> distance for 0.1, 0.2, 0.5, 1.0, or 5.0 ns. Residues shown (licorice representations) are those proposed to be important for binding P<sub>i</sub> (Lys<sup>492</sup>, Asp<sup>178</sup>, Tyr<sup>179</sup>) and those that are involved in proton transfer (Asp<sup>76</sup>, Asp<sup>79</sup>, Asp<sup>178</sup>, Arg<sup>168</sup>, and Arg<sup>267</sup>). The coordinate axes are shown in green (x-axis), red (y-axis), and blue (z-axis).

*Pho84 – 2minus*

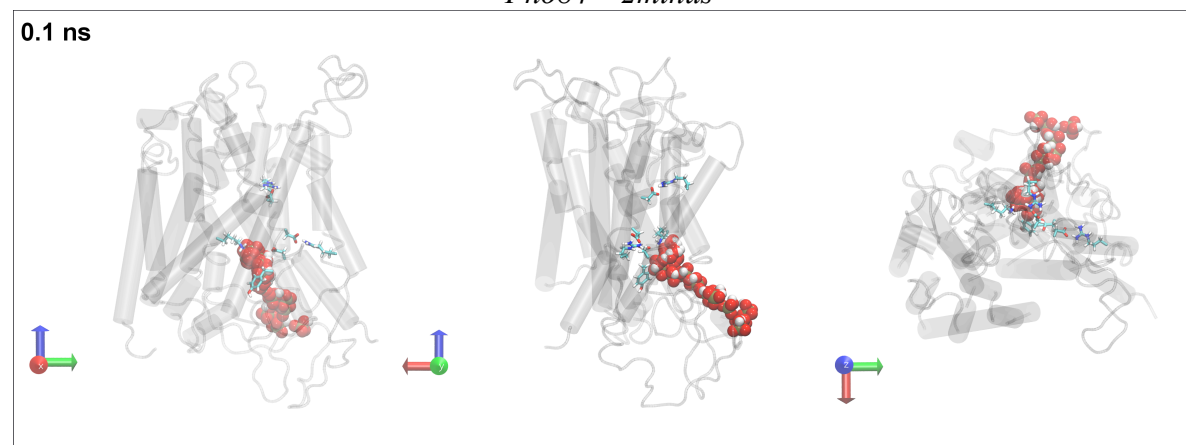

**Figure S34.** Snapshots derived from SMD simulations of Pho84 obtained prior to 3.5 ns of simulation and multiple structures with  $\text{HPO}_4^{2-}$  (Pho84 – 2minus) extracted every 0.175 ns (van der Waal volume representations). SMD simulations were performed after initially restraining the Lys<sup>492</sup>-P<sub>i</sub> distance for 0.1, 0.2, 0.5, 1.0, or 5.0 ns. Residues shown (licorice representations) are those proposed to be important for binding P<sub>i</sub> (Lys<sup>492</sup>, Asp<sup>178</sup>, Tyr<sup>179</sup>) or those that are involved in the proton transfer system (Asp<sup>76</sup>, Asp<sup>79</sup>, Asp<sup>178</sup>, Arg<sup>168</sup>, and Arg<sup>267</sup>). The coordinate axes are shown in green (x-axis), red (y-axis), and blue (z-axis).
